# Supplementary material for: Aurora B Inhibitors as Cancer Therapeutics
Source: MDPI journal article supplement (doi:10.3390/molecules28083385), 2023-04-11
Supplement: s1 [file s1]

# Supplementary S1: Aurora B inhibitors.

BI 847325

DSViewer

3D

0

35 38 0 0 0 0 0 0 0 0999 V2000

|         |         |        |   |   |   |
|---------|---------|--------|---|---|---|
| 7.7600  | 2.5630  | 5.0420 | C | 0 | 0 |
| 9.1380  | 2.7820  | 5.3110 | C | 0 | 0 |
| 9.5400  | 3.9010  | 6.0720 | C | 0 | 0 |
| 11.3770 | 2.7170  | 5.7610 | C | 0 | 0 |
| 11.7650 | 0.2720  | 4.4280 | N | 0 | 0 |
| 9.3550  | 0.1710  | 3.6850 | C | 0 | 0 |
| 7.6590  | -1.5180 | 3.2220 | C | 0 | 0 |
| 7.7970  | 0.4420  | 1.7880 | C | 0 | 0 |
| 13.6390 | -1.0830 | 4.1730 | C | 0 | 0 |
| 14.3470 | -2.1100 | 3.5970 | C | 0 | 0 |
| 13.7880 | -2.7810 | 2.5000 | C | 0 | 0 |
| 11.7830 | -1.4550 | 2.6250 | C | 0 | 0 |
| 5.3670  | 6.3480  | 6.8130 | C | 0 | 0 |
| 3.3730  | 7.2900  | 6.1710 | O | 0 | 0 |
| 4.2740  | 7.2670  | 7.0070 | C | 0 | 0 |
| 4.1840  | 8.0940  | 8.0480 | N | 0 | 0 |
| 3.0030  | 8.9930  | 8.1430 | C | 0 | 0 |
| 2.8410  | 9.5210  | 9.5500 | C | 0 | 0 |
| 6.2060  | 5.5790  | 6.5230 | C | 0 | 0 |
| 7.2190  | 4.6500  | 6.1690 | C | 0 | 0 |
| 8.5810  | 4.8550  | 6.4670 | C | 0 | 0 |
| 10.9040 | 3.8410  | 6.2860 | N | 0 | 0 |
| 12.5490 | 2.4240  | 5.7540 | O | 0 | 0 |
| 10.3490 | 1.9890  | 5.0910 | C | 0 | 0 |
| 6.8280  | 3.5070  | 5.4080 | C | 0 | 0 |
| 10.4970 | 0.7890  | 4.3820 | C | 0 | 0 |
| 8.8650  | 0.8980  | 2.5300 | C | 0 | 0 |
| 7.1730  | -0.7770 | 2.1350 | C | 0 | 0 |
| 8.7410  | -1.0910 | 4.0170 | C | 0 | 0 |
| 12.3560 | -0.7830 | 3.7370 | C | 0 | 0 |
| 12.5090 | -2.4660 | 2.0250 | C | 0 | 0 |
| 14.5910 | -3.8710 | 1.8200 | C | 0 | 0 |
| 14.5000 | -5.1650 | 2.4980 | N | 0 | 0 |
| 14.7850 | -6.2310 | 1.5090 | C | 0 | 0 |
| 15.4450 | -5.2370 | 3.6450 | C | 0 | 0 |

1 2 4 0 0 0

1 25 4 0 0 0

2 3 4 0 0 0

2 24 1 0 0 0

3 21 4 0 0 0

3 22 1 0 0 0

4 22 1 0 0 0

4 23 2 0 0 0

4 24 1 0 0 0

5 26 1 0 0 0

5 30 1 0 0 0

6 26 1 0 0 0

```

6 27 4 0 0 0
6 29 4 0 0 0
7 28 4 0 0 0
7 29 4 0 0 0
8 27 4 0 0 0
8 28 4 0 0 0
9 10 4 0 0 0
9 30 4 0 0 0
10 11 4 0 0 0
11 31 4 0 0 0
11 32 1 0 0 0
12 30 4 0 0 0
12 31 4 0 0 0
13 15 1 0 0 0
13 19 3 0 0 0
14 15 2 0 0 0
15 16 1 0 0 0
16 17 1 0 0 0
17 18 1 0 0 0
19 20 1 0 0 0
20 21 4 0 0 0
20 25 4 0 0 0
24 26 2 0 0 0
32 33 1 0 0 0
33 34 1 0 0 0
33 35 1 0 0 0

```

M END

> <Resolution>

1.93

\$\$\$\$

VX-680

DSViewer

3D

0

```

33 37 0 0 0 0 0 0 0 0 0999 V2000
44.0070 48.0820 54.1290 N 0 0
42.6140 47.6750 54.4180 C 0 0
42.3440 47.7770 55.9240 C 0 0
42.6900 49.1460 56.3750 N 0 0
44.0440 49.6690 56.0430 C 0 0
44.2900 49.4770 54.5360 C 0 0
44.2450 47.9480 52.6810 C 0 0
41.7500 49.9340 57.0780 C 0 0
40.6760 49.3350 57.7350 C 0 0
39.7630 50.1360 58.4180 C 0 0
39.9420 51.4660 58.4200 N 0 0
40.9800 52.0360 57.7830 C 0 0
41.8730 51.2770 57.1180 N 0 0
38.7280 49.5620 59.0420 N 0 0
37.9920 50.1040 60.0280 C 0 0
37.9700 51.3660 60.4530 C 0 0
37.0710 51.3470 61.4300 C 0 0

```

|         |         |           |   |   |
|---------|---------|-----------|---|---|
| 36.5820 | 50.1260 | 61.5650 N | 0 | 0 |
| 37.1270 | 49.3950 | 60.7380 N | 0 | 0 |
| 36.6350 | 52.5270 | 62.2930 C | 0 | 0 |
| 41.1650 | 53.7850 | 57.8290 S | 0 | 0 |
| 39.5770 | 54.2770 | 58.4090 C | 0 | 0 |
| 39.3180 | 54.3800 | 59.7770 C | 0 | 0 |
| 38.0530 | 54.7730 | 60.2220 C | 0 | 0 |
| 37.0350 | 55.0600 | 59.3030 C | 0 | 0 |
| 37.3090 | 54.9530 | 57.9380 C | 0 | 0 |
| 38.5700 | 54.5650 | 57.4920 C | 0 | 0 |
| 35.7920 | 55.4360 | 59.6580 N | 0 | 0 |
| 35.3420 | 55.7770 | 60.8760 C | 0 | 0 |
| 36.0160 | 55.8020 | 61.9100 O | 0 | 0 |
| 33.8470 | 56.1530 | 60.8890 C | 0 | 0 |
| 33.5260 | 57.5720 | 61.3710 C | 0 | 0 |
| 33.2100 | 56.3700 | 62.2660 C | 0 | 0 |
| 1 2     | 1 0 0 0 |           |   |   |
| 1 6     | 1 0 0 0 |           |   |   |
| 1 7     | 1 0 0 0 |           |   |   |
| 2 3     | 1 0 0 0 |           |   |   |
| 3 4     | 1 0 0 0 |           |   |   |
| 4 5     | 1 0 0 0 |           |   |   |
| 4 8     | 1 0 0 0 |           |   |   |
| 5 6     | 1 0 0 0 |           |   |   |
| 8 9     | 4 0 0 0 |           |   |   |
| 8 13    | 4 0 0 0 |           |   |   |
| 9 10    | 4 0 0 0 |           |   |   |
| 10 11   | 4 0 0 0 |           |   |   |
| 10 14   | 1 0 0 0 |           |   |   |
| 11 12   | 4 0 0 0 |           |   |   |
| 12 13   | 4 0 0 0 |           |   |   |
| 12 21   | 1 0 0 0 |           |   |   |
| 14 15   | 1 0 0 0 |           |   |   |
| 15 16   | 2 0 0 0 |           |   |   |
| 15 19   | 1 0 0 0 |           |   |   |
| 16 17   | 1 0 0 0 |           |   |   |
| 17 18   | 2 0 0 0 |           |   |   |
| 17 20   | 1 0 0 0 |           |   |   |
| 18 19   | 1 0 0 0 |           |   |   |
| 21 22   | 1 0 0 0 |           |   |   |
| 22 23   | 4 0 0 0 |           |   |   |
| 22 27   | 4 0 0 0 |           |   |   |
| 23 24   | 4 0 0 0 |           |   |   |
| 24 25   | 4 0 0 0 |           |   |   |
| 25 26   | 4 0 0 0 |           |   |   |
| 25 28   | 1 0 0 0 |           |   |   |
| 26 27   | 4 0 0 0 |           |   |   |
| 28 29   | 1 0 0 0 |           |   |   |
| 29 30   | 2 0 0 0 |           |   |   |
| 29 31   | 1 0 0 0 |           |   |   |
| 31 32   | 1 0 0 0 |           |   |   |
| 31 33   | 1 0 0 0 |           |   |   |

32 33 1 0 0 0

M END

> <Resolution>

1.85

\$\$\$

BI 811283

DSViewer

3D

0

40 43 0 0 0 0 0 0 0 0999 V2000

9.9170 2.3940 4.9620 C 0 0

10.2020 3.6130 5.6530 C 0 0

12.1550 -0.8520 3.4560 C 0 0

14.6790 -1.9660 3.2050 C 0 0

13.7860 -3.6890 1.5740 C 0 0

8.6400 0.8170 2.3850 C 0 0

7.3230 1.0650 1.6570 C 0 0

6.2540 1.3030 2.7130 C 0 0

6.1520 1.0040 5.2500 C 0 0

5.7940 0.6880 8.4060 C 0 0

11.5000 3.7400 6.1200 C 0 0

12.4660 2.8370 5.8990 N 0 0

12.1000 1.7460 5.2060 C 0 0

10.8730 1.4790 4.7280 N 0 0

8.6720 2.1000 4.5210 N 0 0

13.0870 0.8260 4.9930 N 0 0

13.2080 -0.3450 4.2120 C 0 0

12.3520 -1.9440 2.6260 C 0 0

13.6040 -2.5560 2.5380 C 0 0

14.4850 -0.8730 4.0340 C 0 0

13.4220 -3.5090 0.4220 O 0 0

14.3410 -4.8610 1.9860 N 0 0

14.8030 -5.1460 3.3440 C 0 0

8.3060 0.8470 3.8850 C 0 0

6.7840 0.5540 3.9430 C 0 0

5.7280 0.0100 6.0490 N 0 0

6.0530 2.1990 5.5290 O 0 0

4.9380 0.1810 7.2790 C 0 0

3.7100 1.0380 7.0570 C 0 0

9.1770 4.6750 5.9470 C 0 0

8.2400 4.2530 6.7800 F 0 0

9.7070 5.7770 6.4670 F 0 0

8.5200 5.0770 4.8350 F 0 0

14.5820 -6.0480 1.0630 C 0 0

15.5910 -5.7540 -0.0500 C 0 0

15.8250 -6.9740 -0.9430 C 0 0

14.5270 -7.4790 -1.4880 N 0 0

13.6160 -7.8890 -0.3730 C 0 0

13.3010 -6.7000 0.5370 C 0 0

14.7350 -8.5880 -2.4630 C 0 0

1 2 1 0 0 0

1 14 1 0 0 0

```

1 15 2 0 0 0
2 11 2 0 0 0
2 30 1 0 0 0
3 17 4 0 0 0
3 18 4 0 0 0
4 19 4 0 0 0
4 20 4 0 0 0
5 19 1 0 0 0
5 21 2 0 0 0
5 22 1 0 0 0
6 7 1 0 0 0
6 24 1 0 0 0
7 8 1 0 0 0
8 25 1 0 0 0
9 25 1 0 0 0
9 26 1 0 0 0
9 27 2 0 0 0
10 28 1 0 0 0
11 12 1 0 0 0
12 13 2 0 0 0
13 14 1 0 0 0
13 16 1 0 0 0
15 24 1 0 0 0
16 17 1 0 0 0
17 20 4 0 0 0
18 19 4 0 0 0
22 23 1 0 0 0
22 34 1 0 0 0
24 25 1 0 0 0
26 28 1 0 0 0
28 29 1 0 0 0
30 31 1 0 0 0
30 32 1 0 0 0
30 33 1 0 0 0
34 35 1 0 0 0
34 39 1 0 0 0
35 36 1 0 0 0
36 37 1 0 0 0
37 38 1 0 0 0
37 40 1 0 0 0
38 39 1 0 0 0

```

M END

> <Resolution>

1.6

\$\$\$

ZM447439

DSViewer

3D

0

```

38 42 0 0 0 0 0 0 0 0 0999 V2000
44.1060 46.4760 54.4970 C 0 0
44.1830 45.5890 53.2480 C 0 0

```

|         |         |         |   |   |   |
|---------|---------|---------|---|---|---|
| 43.5600 | 46.2460 | 52.1140 | O | 0 | 0 |
| 43.8400 | 47.6670 | 52.0600 | C | 0 | 0 |
| 43.1810 | 48.3730 | 53.2490 | C | 0 | 0 |
| 43.0190 | 47.4780 | 54.4130 | N | 0 | 0 |
| 43.0290 | 48.3040 | 55.6310 | C | 0 | 0 |
| 42.2100 | 47.6790 | 56.7660 | C | 0 | 0 |
| 41.7650 | 48.7720 | 57.7350 | C | 0 | 0 |
| 40.7210 | 49.5350 | 57.1120 | O | 0 | 0 |
| 39.8490 | 50.1150 | 57.9890 | C | 0 | 0 |
| 39.0190 | 49.3740 | 58.8270 | C | 0 | 0 |
| 39.8000 | 51.5100 | 58.0010 | C | 0 | 0 |
| 40.6470 | 52.1500 | 57.1360 | O | 0 | 0 |
| 40.5400 | 53.5920 | 57.1540 | C | 0 | 0 |
| 38.9250 | 52.1760 | 58.8670 | C | 0 | 0 |
| 38.0950 | 51.4380 | 59.7150 | C | 0 | 0 |
| 38.1480 | 50.0350 | 59.6900 | C | 0 | 0 |
| 37.3610 | 49.3060 | 60.4970 | N | 0 | 0 |
| 36.4740 | 49.9410 | 61.3710 | C | 0 | 0 |
| 36.4200 | 51.3360 | 61.4050 | N | 0 | 0 |
| 37.2090 | 52.0680 | 60.5960 | C | 0 | 0 |
| 37.1620 | 53.4230 | 60.5990 | N | 0 | 0 |
| 36.0820 | 53.9830 | 61.1790 | C | 0 | 0 |
| 36.2320 | 54.7750 | 62.3140 | C | 0 | 0 |
| 35.1140 | 55.3470 | 62.9220 | C | 0 | 0 |
| 34.7980 | 53.7630 | 60.6670 | C | 0 | 0 |
| 33.6770 | 54.3240 | 61.2780 | C | 0 | 0 |
| 33.8380 | 55.1310 | 62.4000 | C | 0 | 0 |
| 32.7640 | 55.6510 | 63.0110 | N | 0 | 0 |
| 32.2890 | 56.8780 | 62.7310 | C | 0 | 0 |
| 32.7620 | 57.6650 | 61.9060 | O | 0 | 0 |
| 31.1710 | 57.1970 | 63.5010 | C | 0 | 0 |
| 29.9710 | 57.5870 | 62.9010 | C | 0 | 0 |
| 28.8620 | 57.8880 | 63.6960 | C | 0 | 0 |
| 28.9500 | 57.7930 | 65.0870 | C | 0 | 0 |
| 30.1440 | 57.4000 | 65.6910 | C | 0 | 0 |
| 31.2500 | 57.0980 | 64.8970 | C | 0 | 0 |
| 1       | 2       | 1       | 0 | 0 | 0 |
| 1       | 6       | 1       | 0 | 0 | 0 |
| 2       | 3       | 1       | 0 | 0 | 0 |
| 3       | 4       | 1       | 0 | 0 | 0 |
| 4       | 5       | 1       | 0 | 0 | 0 |
| 5       | 6       | 1       | 0 | 0 | 0 |
| 6       | 7       | 1       | 0 | 0 | 0 |
| 7       | 8       | 1       | 0 | 0 | 0 |
| 8       | 9       | 1       | 0 | 0 | 0 |
| 9       | 10      | 1       | 0 | 0 | 0 |
| 10      | 11      | 1       | 0 | 0 | 0 |
| 11      | 12      | 4       | 0 | 0 | 0 |
| 11      | 13      | 4       | 0 | 0 | 0 |
| 12      | 18      | 4       | 0 | 0 | 0 |
| 13      | 14      | 1       | 0 | 0 | 0 |
| 13      | 16      | 4       | 0 | 0 | 0 |

```

14 15  1  0  0  0
16 17  4  0  0  0
17 18  4  0  0  0
17 22  4  0  0  0
18 19  4  0  0  0
19 20  4  0  0  0
20 21  4  0  0  0
21 22  4  0  0  0
22 23  1  0  0  0
23 24  1  0  0  0
24 25  4  0  0  0
24 27  4  0  0  0
25 26  4  0  0  0
26 29  4  0  0  0
27 28  4  0  0  0
28 29  4  0  0  0
29 30  1  0  0  0
30 31  1  0  0  0
31 32  2  0  0  0
31 33  1  0  0  0
33 34  4  0  0  0
33 38  4  0  0  0
34 35  4  0  0  0
35 36  4  0  0  0
36 37  4  0  0  0
37 38  4  0  0  0

```

M END

> <Resolution>

1.86

\$\$\$\$

Reversine

DSViewer

3D

0

```

29 33  0  0  0  0  0  0  0  0  0999 V2000
   7.4330   0.4430   2.4390 C   0  0
   6.2010   1.2800   2.0640 C   0  0
   5.0300   1.0330   3.0310 C   0  0
   5.5070   0.4120   4.3540 C   0  0
   6.8000   1.0790   4.8350 C   0  0
   7.9550   0.8340   3.8350 C   0  0
   8.7770   2.0490   3.7300 N   0  0
   9.9290   2.1840   4.4000 C   0  0
  10.8870   1.2450   4.3620 N   0  0
  10.0780   3.2980   5.1130 C   0  0
   9.2900   4.3510   5.3070 N   0  0
   9.9270   5.1930   6.1150 C   0  0
  11.1070   4.6580   6.4190 N   0  0
  11.2040   3.4870   5.8020 C   0  0
  12.1770   2.5600   5.7730 N   0  0
  12.0290   1.4300   5.0480 C   0  0
  13.0270   0.5220   5.0650 N   0  0

```

|         |         |           |   |   |
|---------|---------|-----------|---|---|
| 13.2180 | -0.4310 | 4.1230 C  | 0 | 0 |
| 14.5080 | -0.9480 | 4.0140 C  | 0 | 0 |
| 14.8090 | -1.9400 | 3.0920 C  | 0 | 0 |
| 12.2140 | -0.9380 | 3.2900 C  | 0 | 0 |
| 12.5110 | -1.9290 | 2.3510 C  | 0 | 0 |
| 13.8110 | -2.4370 | 2.2540 C  | 0 | 0 |
| 14.1310 | -3.3890 | 1.3550 N  | 0 | 0 |
| 13.4760 | -4.7300 | 1.3930 C  | 0 | 0 |
| 14.4290 | -5.8380 | 0.9340 C  | 0 | 0 |
| 15.1330 | -5.4230 | -0.2650 O | 0 | 0 |
| 16.0110 | -4.3030 | -0.0030 C | 0 | 0 |
| 15.1600 | -3.0750 | 0.3180 C  | 0 | 0 |
| 1       | 2       | 1         | 0 | 0 |
| 1       | 6       | 1         | 0 | 0 |
| 2       | 3       | 1         | 0 | 0 |
| 3       | 4       | 1         | 0 | 0 |
| 4       | 5       | 1         | 0 | 0 |
| 5       | 6       | 1         | 0 | 0 |
| 6       | 7       | 1         | 0 | 0 |
| 7       | 8       | 1         | 0 | 0 |
| 8       | 9       | 4         | 0 | 0 |
| 8       | 10      | 4         | 0 | 0 |
| 9       | 16      | 4         | 0 | 0 |
| 10      | 11      | 1         | 0 | 0 |
| 10      | 14      | 4         | 0 | 0 |
| 11      | 12      | 2         | 0 | 0 |
| 12      | 13      | 1         | 0 | 0 |
| 13      | 14      | 1         | 0 | 0 |
| 14      | 15      | 4         | 0 | 0 |
| 15      | 16      | 4         | 0 | 0 |
| 16      | 17      | 1         | 0 | 0 |
| 17      | 18      | 1         | 0 | 0 |
| 18      | 19      | 4         | 0 | 0 |
| 18      | 21      | 4         | 0 | 0 |
| 19      | 20      | 4         | 0 | 0 |
| 20      | 23      | 4         | 0 | 0 |
| 21      | 22      | 4         | 0 | 0 |
| 22      | 23      | 4         | 0 | 0 |
| 23      | 24      | 1         | 0 | 0 |
| 24      | 25      | 1         | 0 | 0 |
| 24      | 29      | 1         | 0 | 0 |
| 25      | 26      | 1         | 0 | 0 |
| 26      | 27      | 1         | 0 | 0 |
| 27      | 28      | 1         | 0 | 0 |
| 28      | 29      | 1         | 0 | 0 |

M END

> <Resolution>

1.7

\$\$\$\$

Hesperadin

DSViewer

3D

0



|         |         |        |   |   |   |   |   |   |   |      |       |
|---------|---------|--------|---|---|---|---|---|---|---|------|-------|
| 37      | 41      | 0      | 0 | 0 | 0 | 0 | 0 | 0 | 0 | 0999 | V2000 |
| 16.0320 | -4.5090 | 3.5270 | C | 0 | 0 |   |   |   |   |      |       |
| 16.3080 | -5.8530 | 4.2050 | C | 0 | 0 |   |   |   |   |      |       |
| 14.9940 | -6.6020 | 4.4400 | C | 0 | 0 |   |   |   |   |      |       |
| 14.2350 | -6.7630 | 3.1220 | C | 0 | 0 |   |   |   |   |      |       |
| 14.0080 | -5.3920 | 2.4770 | C | 0 | 0 |   |   |   |   |      |       |
| 15.2950 | -4.7130 | 2.2670 | N | 0 | 0 |   |   |   |   |      |       |
| 15.0870 | -3.4400 | 1.5530 | C | 0 | 0 |   |   |   |   |      |       |
| 14.2780 | -2.4260 | 2.3650 | C | 0 | 0 |   |   |   |   |      |       |
| 12.9520 | -2.1540 | 2.0370 | C | 0 | 0 |   |   |   |   |      |       |
| 12.2390 | -1.1890 | 2.7430 | C | 0 | 0 |   |   |   |   |      |       |
| 14.8830 | -1.7340 | 3.4120 | C | 0 | 0 |   |   |   |   |      |       |
| 14.1690 | -0.7670 | 4.1120 | C | 0 | 0 |   |   |   |   |      |       |
| 12.8500 | -0.4810 | 3.7770 | C | 0 | 0 |   |   |   |   |      |       |
| 12.2800 | 0.5550  | 4.3960 | N | 0 | 0 |   |   |   |   |      |       |
| 11.0710 | 1.0900  | 4.2110 | C | 0 | 0 |   |   |   |   |      |       |
| 10.0530 | 0.4720  | 3.4810 | C | 0 | 0 |   |   |   |   |      |       |
| 9.5070  | 1.1020  | 2.3690 | C | 0 | 0 |   |   |   |   |      |       |
| 8.4260  | 0.5380  | 1.6970 | C | 0 | 0 |   |   |   |   |      |       |
| 7.8910  | -0.6720 | 2.1370 | C | 0 | 0 |   |   |   |   |      |       |
| 8.4400  | -1.3100 | 3.2430 | C | 0 | 0 |   |   |   |   |      |       |
| 9.5180  | -0.7410 | 3.9160 | C | 0 | 0 |   |   |   |   |      |       |
| 10.7730 | 2.2290  | 4.9410 | C | 0 | 0 |   |   |   |   |      |       |
| 9.5280  | 2.8320  | 5.0960 | C | 0 | 0 |   |   |   |   |      |       |
| 8.2590  | 2.3720  | 4.7850 | C | 0 | 0 |   |   |   |   |      |       |
| 11.6770 | 3.0350  | 5.6310 | C | 0 | 0 |   |   |   |   |      |       |
| 12.8610 | 2.7700  | 5.7690 | O | 0 | 0 |   |   |   |   |      |       |
| 11.0210 | 4.0750  | 6.1580 | N | 0 | 0 |   |   |   |   |      |       |
| 9.7240  | 3.9730  | 5.8700 | C | 0 | 0 |   |   |   |   |      |       |
| 8.5920  | 4.6490  | 6.3300 | C | 0 | 0 |   |   |   |   |      |       |
| 7.3130  | 4.1690  | 6.0510 | C | 0 | 0 |   |   |   |   |      |       |
| 7.1380  | 3.0180  | 5.2830 | C | 0 | 0 |   |   |   |   |      |       |
| 5.9660  | 2.5950  | 4.8120 | N | 0 | 0 |   |   |   |   |      |       |
| 4.5050  | 3.0170  | 5.3880 | S | 0 | 0 |   |   |   |   |      |       |
| 3.5080  | 1.9410  | 5.0770 | O | 0 | 0 |   |   |   |   |      |       |
| 4.0680  | 4.3390  | 4.8300 | O | 0 | 0 |   |   |   |   |      |       |
| 4.7680  | 3.1690  | 7.1920 | C | 0 | 0 |   |   |   |   |      |       |
| 5.0360  | 1.7690  | 7.7530 | C | 0 | 0 |   |   |   |   |      |       |
| 1       | 2       | 1      | 0 | 0 | 0 |   |   |   |   |      |       |
| 1       | 6       | 1      | 0 | 0 | 0 |   |   |   |   |      |       |
| 2       | 3       | 1      | 0 | 0 | 0 |   |   |   |   |      |       |
| 3       | 4       | 1      | 0 | 0 | 0 |   |   |   |   |      |       |
| 4       | 5       | 1      | 0 | 0 | 0 |   |   |   |   |      |       |
| 5       | 6       | 1      | 0 | 0 | 0 |   |   |   |   |      |       |
| 6       | 7       | 1      | 0 | 0 | 0 |   |   |   |   |      |       |
| 7       | 8       | 1      | 0 | 0 | 0 |   |   |   |   |      |       |
| 8       | 9       | 1      | 0 | 0 | 0 |   |   |   |   |      |       |
| 8       | 11      | 1      | 0 | 0 | 0 |   |   |   |   |      |       |
| 9       | 10      | 2      | 0 | 0 | 0 |   |   |   |   |      |       |
| 10      | 13      | 1      | 0 | 0 | 0 |   |   |   |   |      |       |
| 11      | 12      | 2      | 0 | 0 | 0 |   |   |   |   |      |       |

```

12 13  1  0  0  0
13 14  2  0  0  0
14 15  1  0  0  0
15 16  1  0  0  0
15 22  1  0  0  0
16 17  4  0  0  0
16 21  4  0  0  0
17 18  4  0  0  0
18 19  4  0  0  0
19 20  4  0  0  0
20 21  4  0  0  0
22 23  2  0  0  0
22 25  1  0  0  0
23 24  1  0  0  0
23 28  1  0  0  0
24 31  2  0  0  0
25 26  2  0  0  0
25 27  1  0  0  0
27 28  2  0  0  0
28 29  1  0  0  0
29 30  2  0  0  0
30 31  1  0  0  0
31 32  1  0  0  0
32 33  1  0  0  0
33 34  2  0  0  0
33 35  2  0  0  0
33 36  1  0  0  0
36 37  1  0  0  0

```

M END

> <Resolution>

1.8

\$\$\$

Aminothiazole 25

DSViewer

3D

0

```

17 18  0  0  0  0  0  0  0  0  0999 V2000
  12.3400  2.8260  6.2340 N  0  0
  11.3700  3.7560  6.3430 C  0  0
  10.2810  3.4710  5.6180 C  0  0
  10.4890  2.0760  4.8150 S  0  0
  12.0480  1.8060  5.4180 C  0  0
  12.9140  0.7800  5.2240 N  0  0
  12.8580 -0.1470  4.2400 C  0  0
  11.6990 -0.5010  3.5400 C  0  0
  11.7400 -1.4780  2.5370 C  0  0
  14.0540 -0.7990  3.9310 C  0  0
  14.0960 -1.7810  2.9350 C  0  0
  12.9410 -2.1260  2.2250 C  0  0
  12.9890 -3.1020  1.2160 C  0  0
  13.7630 -4.0620  1.2910 O  0  0
  12.1480 -2.8920  0.1780 N  0  0

```

|         |         |         |    |   |   |
|---------|---------|---------|----|---|---|
| 12.1300 | -3.8630 | -0.9340 | C  | 0 | 0 |
| 8.7360  | 4.5630  | 5.5650  | Br | 0 | 0 |

1 2 4 0 0 0  
1 5 4 0 0 0  
2 3 4 0 0 0  
3 4 4 0 0 0  
3 17 1 0 0 0  
4 5 4 0 0 0  
5 6 1 0 0 0  
6 7 1 0 0 0  
7 8 4 0 0 0  
7 10 4 0 0 0  
8 9 4 0 0 0  
9 12 4 0 0 0  
10 11 4 0 0 0  
11 12 4 0 0 0  
12 13 1 0 0 0  
13 14 2 0 0 0  
13 15 1 0 0 0  
15 16 1 0 0 0  
M END  
> <Resolution>  
1.7

\$\$\$\$

GSK1070916

DSViewer

3D

0

38 42 0 0 0 0 0 0 0 0 0999 V2000

|         |          |         |   |   |   |
|---------|----------|---------|---|---|---|
| 31.9187 | -35.3207 | 0.0012  | C | 0 | 0 |
| 31.4922 | -36.5856 | 0.0037  | C | 0 | 0 |
| 32.4586 | -37.6489 | 0.0119  | C | 0 | 0 |
| 33.7537 | -37.3742 | 0.0174  | C | 0 | 0 |
| 34.2585 | -36.0224 | 0.0149  | C | 0 | 0 |
| 33.3683 | -35.0272 | 0.0069  | C | 0 | 0 |
| 30.1265 | -36.9455 | -0.0002 | N | 0 | 0 |
| 29.0482 | -36.0451 | -0.0016 | C | 0 | 0 |
| 29.2168 | -34.8209 | 0.0004  | O | 0 | 0 |
| 27.7543 | -36.5605 | -0.0033 | N | 0 | 0 |
| 26.6291 | -35.6750 | -0.0027 | C | 0 | 0 |
| 27.5511 | -37.9826 | -0.0054 | C | 0 | 0 |
| 35.7414 | -35.6675 | 0.0212  | C | 0 | 0 |
| 37.0369 | -36.5192 | 0.0279  | C | 0 | 0 |
| 38.0245 | -35.6306 | 0.0300  | C | 0 | 0 |
| 37.4259 | -34.3651 | 0.0259  | N | 0 | 0 |
| 36.0876 | -34.4420 | 0.0207  | N | 0 | 0 |
| 38.1522 | -33.1207 | 0.0173  | C | 0 | 0 |
| 39.6718 | -33.3850 | 0.0055  | C | 0 | 0 |
| 37.2731 | -38.0673 | 0.0225  | C | 0 | 0 |
| 36.1603 | -39.0134 | 0.0074  | C | 0 | 0 |
| 36.3372 | -40.3355 | -0.0086 | C | 0 | 0 |
| 37.6138 | -40.8668 | -0.0150 | N | 0 | 0 |

|         |          |         |   |   |   |
|---------|----------|---------|---|---|---|
| 38.5944 | -40.0704 | 0.0009  | C | 0 | 0 |
| 38.4797 | -38.6632 | 0.0232  | C | 0 | 0 |
| 39.9017 | -40.4205 | -0.0127 | N | 0 | 0 |
| 40.6428 | -39.2225 | 0.0052  | C | 0 | 0 |
| 39.8572 | -38.1293 | 0.0314  | C | 0 | 0 |
| 42.0925 | -39.2564 | -0.0333 | C | 0 | 0 |
| 42.6671 | -40.4518 | -0.1356 | C | 0 | 0 |
| 44.1055 | -40.5732 | -0.2227 | C | 0 | 0 |
| 44.8593 | -39.4812 | -0.2039 | C | 0 | 0 |
| 44.2458 | -38.1440 | -0.0720 | C | 0 | 0 |
| 42.9144 | -38.0401 | 0.0023  | C | 0 | 0 |
| 45.0965 | -36.8703 | -0.0685 | C | 0 | 0 |
| 46.5781 | -37.0928 | -0.1715 | N | 0 | 0 |
| 47.2230 | -35.7974 | -0.4195 | C | 0 | 0 |
| 47.1588 | -37.6435 | 1.0822  | C | 0 | 0 |
| 1       | 2        | 2       | 0 | 0 | 0 |
| 2       | 3        | 1       | 0 | 0 | 0 |
| 3       | 4        | 2       | 0 | 0 | 0 |
| 4       | 5        | 1       | 0 | 0 | 0 |
| 5       | 6        | 2       | 0 | 0 | 0 |
| 6       | 1        | 1       | 0 | 0 | 0 |
| 2       | 7        | 1       | 0 | 0 | 0 |
| 7       | 8        | 1       | 0 | 0 | 0 |
| 8       | 9        | 2       | 0 | 0 | 0 |
| 8       | 10       | 1       | 0 | 0 | 0 |
| 10      | 11       | 1       | 0 | 0 | 0 |
| 10      | 12       | 1       | 0 | 0 | 0 |
| 5       | 13       | 1       | 0 | 0 | 0 |
| 13      | 14       | 1       | 0 | 0 | 0 |
| 14      | 15       | 2       | 0 | 0 | 0 |
| 15      | 16       | 1       | 0 | 0 | 0 |
| 16      | 17       | 1       | 0 | 0 | 0 |
| 17      | 13       | 2       | 0 | 0 | 0 |
| 16      | 18       | 1       | 0 | 0 | 0 |
| 18      | 19       | 1       | 0 | 0 | 0 |
| 14      | 20       | 1       | 0 | 0 | 0 |
| 20      | 21       | 1       | 0 | 0 | 0 |
| 21      | 22       | 2       | 0 | 0 | 0 |
| 22      | 23       | 1       | 0 | 0 | 0 |
| 23      | 24       | 2       | 0 | 0 | 0 |
| 24      | 25       | 1       | 0 | 0 | 0 |
| 25      | 20       | 2       | 0 | 0 | 0 |
| 24      | 26       | 1       | 0 | 0 | 0 |
| 26      | 27       | 1       | 0 | 0 | 0 |
| 27      | 28       | 2       | 0 | 0 | 0 |
| 28      | 25       | 1       | 0 | 0 | 0 |
| 27      | 29       | 1       | 0 | 0 | 0 |
| 29      | 30       | 2       | 0 | 0 | 0 |
| 30      | 31       | 1       | 0 | 0 | 0 |
| 31      | 32       | 2       | 0 | 0 | 0 |
| 32      | 33       | 1       | 0 | 0 | 0 |
| 33      | 34       | 2       | 0 | 0 | 0 |

```

34 29 1 0 0 0
33 35 1 0 0 0
35 36 1 0 0 0
36 37 1 0 0 0
36 38 1 0 0 0

```

```

M  END
> <Clean Energy>
54.7492

```

```

$$$$

```

```

CYC116
DSViewer          3D          0

```

```

26 29 0 0 0 0 0 0 0 0 0999 V2000
  2.3522 -27.6909  0.3141 C  0 0
  2.3454 -28.9873 -0.2801 O  0 0
  3.4178 -29.7176  0.3064 C  0 0
  4.7686 -29.1374 -0.1505 C  0 0
  4.8084 -27.6877 -0.0489 N  0 0
  3.5951 -26.8959 -0.1388 C  0 0
  6.0552 -27.0494 -0.0278 C  0 0
  7.2673 -27.8557 -0.0233 C  0 0
  8.4585 -27.2698 -0.0083 C  0 0
  8.5775 -25.8052  0.0043 C  0 0
  7.4659 -25.0681  0.0020 C  0 0
  6.1446 -25.7186 -0.0148 C  0 0
  9.8514 -25.1506  0.0156 N  0 0
 11.1086 -25.8306  0.0116 C  0 0
 11.1678 -27.1038  0.0074 N  0 0
 12.3815 -27.7787  0.0024 C  0 0
 13.5099 -27.0864  0.0012 C  0 0
 13.4410 -25.6395  0.0055 C  0 0
 12.3005 -25.0704  0.0106 N  0 0
 14.7149 -24.8840  0.0033 C  0 0
 16.2534 -25.6810 -0.0025 S  0 0
 17.0752 -24.1442 -0.0021 C  0 0
 16.2684 -23.1518  0.0019 N  0 0
 14.8848 -23.5519  0.0050 C  0 0
 13.7717 -22.5368  0.0097 C  0 0
 18.4647 -24.0132 -0.0056 N  0 0
 1  2  1  0  0  0
 2  3  1  0  0  0
 3  4  1  0  0  0
 4  5  1  0  0  0
 5  6  1  0  0  0
 6  1  1  0  0  0
 5  7  1  0  0  0
 7  8  1  0  0  0
 8  9  2  0  0  0
 9 10  1  0  0  0
10 11  2  0  0  0
11 12  1  0  0  0

```

```

12 7 2 0 0 0
10 13 1 0 0 0
13 14 1 0 0 0
14 15 2 0 0 0
15 16 1 0 0 0
16 17 2 0 0 0
17 18 1 0 0 0
18 19 2 0 0 0
19 14 1 0 0 0
18 20 1 0 0 0
20 21 1 0 0 0
21 22 1 0 0 0
22 23 2 0 0 0
23 24 1 0 0 0
24 20 2 0 0 0
24 25 1 0 0 0
22 26 1 0 0 0

```

M END

> <Clean Energy>

18.7169

\$\$\$

SNS-314

DSViewer

3D

0

```

28 31 0 0 0 0 0 0 0 0999 V2000
  3.2693 -5.6983 0.0027 C 0 0
  3.1922 -7.0398 0.0015 C 0 0
  4.5383 -7.6648 -0.0001 C 0 0
  5.5287 -6.8088 0.0000 C 0 0
  4.9616 -5.1706 0.0021 S 0 0
  4.7786 -9.0302 -0.0018 N 0 0
  5.9889 -9.4359 -0.0033 C 0 0
  7.0791 -8.5179 -0.0033 N 0 0
  6.8988 -7.2470 -0.0016 C 0 0
  7.9783 -6.2706 -0.0013 N 0 0
  9.4455 -6.5409 -0.0026 C 0 0
  9.7812 -8.0365 0.0055 C 0 0
 11.2294 -8.3740 0.0032 C 0 0
 11.7589 -9.9976 0.0047 S 0 0
 13.4144 -9.4928 0.0004 C 0 0
 13.5350 -8.2154 -0.0019 N 0 0
 12.2547 -7.5185 -0.0004 C 0 0
 14.4939 -10.3957 -0.0005 N 0 0
 14.2624 -11.7959 -0.0004 C 0 0
 15.3082 -12.7455 -0.0007 N 0 0
 13.1054 -12.2264 -0.0002 O 0 0
 16.6874 -12.4556 -0.0006 C 0 0
 17.5411 -13.4771 -0.0009 C 0 0
 18.9806 -13.2386 -0.0007 C 0 0
 19.4494 -11.9925 -0.0002 C 0 0
 18.5187 -10.8621 0.0001 C 0 0

```

```

17.2054 -11.0813 -0.0001 C 0 0
20.0730 -14.5766 -0.0011 C1 0 0
1 2 2 0 0 0
2 3 1 0 0 0
3 4 2 0 0 0
4 5 1 0 0 0
5 1 1 0 0 0
3 6 1 0 0 0
6 7 2 0 0 0
7 8 1 0 0 0
8 9 2 0 0 0
9 4 1 0 0 0
9 10 1 0 0 0
10 11 1 0 0 0
11 12 1 0 0 0
12 13 1 0 0 0
13 14 1 0 0 0
14 15 1 0 0 0
15 16 2 0 0 0
16 17 1 0 0 0
17 13 2 0 0 0
15 18 1 0 0 0
18 19 1 0 0 0
19 20 1 0 0 0
19 21 2 0 0 0
20 22 1 0 0 0
22 23 2 0 0 0
23 24 1 0 0 0
24 25 2 0 0 0
25 26 1 0 0 0
26 27 2 0 0 0
27 22 1 0 0 0
24 28 1 0 0 0
M END
> <Clean Energy>
32.9355

$$$$
AMG 900
DSViewer 3D 0

37 42 0 0 0 0 0 0 0 0999 V2000
31.7125 -5.7697 -0.0010 C 0 0
31.7431 -7.0956 -0.0008 C 0 0
33.0217 -7.7824 -0.0001 C 0 0
34.1495 -7.0468 0.0002 C 0 0
34.0759 -5.6437 -0.0002 N 0 0
32.9634 -5.0290 -0.0008 C 0 0
32.9949 -9.2961 0.0002 C 0 0
31.8624 -9.8755 -0.0001 N 0 0
31.7550 -11.2812 0.0000 C 0 0
32.7933 -12.0196 0.0004 N 0 0

```

|         |          |         |   |   |   |
|---------|----------|---------|---|---|---|
| 34.0700 | -11.4556 | 0.0007  | C | 0 | 0 |
| 34.2016 | -10.1334 | 0.0006  | C | 0 | 0 |
| 30.4910 | -11.8726 | -0.0002 | N | 0 | 0 |
| 35.3620 | -7.6975  | 0.0011  | O | 0 | 0 |
| 36.5933 | -7.0128  | 0.0009  | C | 0 | 0 |
| 37.6303 | -7.8105  | 0.0026  | C | 0 | 0 |
| 38.9247 | -7.2970  | 0.0024  | C | 0 | 0 |
| 39.2305 | -6.0276  | 0.0003  | C | 0 | 0 |
| 38.0951 | -5.0622  | -0.0015 | C | 0 | 0 |
| 36.8313 | -5.5315  | -0.0011 | C | 0 | 0 |
| 40.6418 | -5.5964  | -0.0004 | N | 0 | 0 |
| 41.9693 | -6.3815  | -0.0002 | C | 0 | 0 |
| 42.2245 | -7.9269  | -0.0005 | C | 0 | 0 |
| 43.4847 | -8.3570  | -0.0001 | C | 0 | 0 |
| 44.5763 | -7.3853  | 0.0003  | C | 0 | 0 |
| 44.3007 | -6.1407  | 0.0004  | N | 0 | 0 |
| 43.0181 | -5.6486  | 0.0002  | N | 0 | 0 |
| 41.1957 | -8.9664  | -0.0013 | C | 0 | 0 |
| 41.4479 | -10.2648 | -0.0013 | C | 0 | 0 |
| 42.7950 | -10.7054 | -0.0007 | C | 0 | 0 |
| 43.7583 | -9.7997  | -0.0002 | C | 0 | 0 |
| 46.0257 | -7.8315  | 0.0004  | C | 0 | 0 |
| 46.6092 | -9.4998  | 0.0005  | S | 0 | 0 |
| 48.2791 | -9.0493  | 0.0004  | C | 0 | 0 |
| 48.3713 | -7.7189  | 0.0003  | C | 0 | 0 |
| 47.0562 | -6.9838  | 0.0004  | C | 0 | 0 |
| 49.6933 | -7.0188  | 0.0002  | C | 0 | 0 |
| 1       | 2        | 2       | 0 | 0 | 0 |
| 2       | 3        | 1       | 0 | 0 | 0 |
| 3       | 4        | 2       | 0 | 0 | 0 |
| 4       | 5        | 1       | 0 | 0 | 0 |
| 5       | 6        | 2       | 0 | 0 | 0 |
| 6       | 1        | 1       | 0 | 0 | 0 |
| 3       | 7        | 1       | 0 | 0 | 0 |
| 7       | 8        | 2       | 0 | 0 | 0 |
| 8       | 9        | 1       | 0 | 0 | 0 |
| 9       | 10       | 2       | 0 | 0 | 0 |
| 10      | 11       | 1       | 0 | 0 | 0 |
| 11      | 12       | 2       | 0 | 0 | 0 |
| 12      | 7        | 1       | 0 | 0 | 0 |
| 9       | 13       | 1       | 0 | 0 | 0 |
| 4       | 14       | 1       | 0 | 0 | 0 |
| 14      | 15       | 1       | 0 | 0 | 0 |
| 15      | 16       | 2       | 0 | 0 | 0 |
| 16      | 17       | 1       | 0 | 0 | 0 |
| 17      | 18       | 2       | 0 | 0 | 0 |
| 18      | 19       | 1       | 0 | 0 | 0 |
| 19      | 20       | 2       | 0 | 0 | 0 |
| 20      | 15       | 1       | 0 | 0 | 0 |
| 18      | 21       | 1       | 0 | 0 | 0 |
| 21      | 22       | 1       | 0 | 0 | 0 |
| 22      | 23       | 1       | 0 | 0 | 0 |



```

23 24  2  0  0  0
24 25  1  0  0  0
25 26  2  0  0  0
26 27  1  0  0  0
27 22  2  0  0  0
23 28  1  0  0  0
28 29  2  0  0  0
29 30  1  0  0  0
30 31  2  0  0  0
31 24  1  0  0  0
25 32  1  0  0  0
32 33  1  0  0  0
33 34  1  0  0  0
34 35  2  0  0  0
35 36  1  0  0  0
36 32  2  0  0  0
35 37  1  0  0  0

```

M END

> <Clean Energy>

40.1834

\$\$\$\$

PHA-739358

DSViewer

3D

0

```

35 39  0  0  0  0  0  0  0  0  0  0999 V2000
 28.0449 -24.5395  0.2897 C  0  0
 28.0226 -25.8802 -0.3006 N  0  0
 29.1386 -26.6102  0.2952 C  0  0
 30.4785 -26.0095 -0.1615 C  0  0
 30.5139 -24.5593 -0.0632 N  0  0
 29.3012 -23.7641 -0.1629 C  0  0
 31.7639 -23.9218 -0.0510 C  0  0
 32.9779 -24.7364 -0.0414 C  0  0
 34.1720 -24.1554 -0.0365 C  0  0
 34.2846 -22.7031 -0.0400 C  0  0
 33.1831 -21.9463 -0.0469 C  0  0
 31.8582 -22.5907 -0.0539 C  0  0
 35.6096 -22.0990 -0.0262 C  0  0
 36.5814 -22.8579 -0.0067 O  0  0
 35.7494 -20.7685 -0.0182 N  0  0
 36.9853 -20.0124  0.0181 C  0  0
 38.3829 -20.4567  0.0220 C  0  0
 39.1221 -19.4116  0.0958 C  0  0
 38.3423 -18.2751  0.1308 N  0  0
 37.0119 -18.7263  0.0806 N  0  0
 39.1336 -21.7292 -0.0287 C  0  0
 40.5088 -21.1589  0.0393 N  0  0
 40.5698 -19.6609  0.1308 C  0  0
 41.6441 -22.0179  0.0225 C  0  0
 41.4139 -23.2288 -0.0556 O  0  0
 43.1045 -21.4614  0.1442 C  0  0

```

|         |          |         |   |   |   |
|---------|----------|---------|---|---|---|
| 44.2583 | -22.5716 | 0.0628  | C | 0 | 0 |
| 43.9523 | -23.8699 | -0.0048 | C | 0 | 0 |
| 44.9911 | -24.9010 | -0.0696 | C | 0 | 0 |
| 46.2754 | -24.5591 | -0.0606 | C | 0 | 0 |
| 46.6452 | -23.1538 | 0.0230  | C | 0 | 0 |
| 45.7013 | -22.2168 | 0.0875  | C | 0 | 0 |
| 43.2450 | -20.3504 | -0.8198 | O | 0 | 0 |
| 44.3625 | -19.4634 | -0.5904 | C | 0 | 0 |
| 26.7717 | -26.5455 | 0.0861  | C | 0 | 0 |
| 1       | 2        | 1       | 0 | 0 | 0 |
| 2       | 3        | 1       | 0 | 0 | 0 |
| 3       | 4        | 1       | 0 | 0 | 0 |
| 4       | 5        | 1       | 0 | 0 | 0 |
| 5       | 6        | 1       | 0 | 0 | 0 |
| 6       | 1        | 1       | 0 | 0 | 0 |
| 5       | 7        | 1       | 0 | 0 | 0 |
| 7       | 8        | 1       | 0 | 0 | 0 |
| 8       | 9        | 2       | 0 | 0 | 0 |
| 9       | 10       | 1       | 0 | 0 | 0 |
| 10      | 11       | 2       | 0 | 0 | 0 |
| 11      | 12       | 1       | 0 | 0 | 0 |
| 12      | 7        | 2       | 0 | 0 | 0 |
| 10      | 13       | 1       | 0 | 0 | 0 |
| 13      | 14       | 2       | 0 | 0 | 0 |
| 13      | 15       | 1       | 0 | 0 | 0 |
| 15      | 16       | 1       | 0 | 0 | 0 |
| 16      | 17       | 1       | 0 | 0 | 0 |
| 17      | 18       | 2       | 0 | 0 | 0 |
| 18      | 19       | 1       | 0 | 0 | 0 |
| 19      | 20       | 1       | 0 | 0 | 0 |
| 20      | 16       | 2       | 0 | 0 | 0 |
| 17      | 21       | 1       | 0 | 0 | 0 |
| 21      | 22       | 1       | 0 | 0 | 0 |
| 22      | 23       | 1       | 0 | 0 | 0 |
| 23      | 18       | 1       | 0 | 0 | 0 |
| 22      | 24       | 1       | 0 | 0 | 0 |
| 24      | 25       | 2       | 0 | 0 | 0 |
| 24      | 26       | 1       | 0 | 0 | 0 |
| 26      | 27       | 1       | 0 | 0 | 0 |
| 27      | 28       | 2       | 0 | 0 | 0 |
| 28      | 29       | 1       | 0 | 0 | 0 |
| 29      | 30       | 2       | 0 | 0 | 0 |
| 30      | 31       | 1       | 0 | 0 | 0 |
| 31      | 32       | 2       | 0 | 0 | 0 |
| 32      | 27       | 1       | 0 | 0 | 0 |
| 26      | 33       | 1       | 0 | 0 | 0 |
| 33      | 34       | 1       | 0 | 0 | 0 |
| 2       | 35       | 1       | 0 | 0 | 0 |

M END

> <Clean Energy>

76.9805

\$\$\$\$

AT9283

DSViewer

3D

0

```
28 32 0 0 0 0 0 0 0 0 0999 V2000
  2.4406 -37.3959 0.7261 C 0 0
  2.0944 -38.3771 -0.2657 O 0 0
  3.1398 -39.3549 -0.3946 C 0 0
  4.4474 -38.6567 -0.8294 C 0 0
  4.8394 -37.6729 0.2176 N 0 0
  3.7518 -36.6812 0.3277 C 0 0
  6.1117 -36.9412 -0.1024 C 0 0
  7.4200 -37.7579 -0.0348 C 0 0
  7.4406 -39.0823 0.2066 C 0 0
  8.7228 -39.8182 0.2744 C 0 0
  9.8324 -39.1114 0.1111 C 0 0
  9.8259 -37.7472 -0.1108 C 0 0
  8.7081 -37.0377 -0.1987 C 0 0
 11.1365 -39.5358 0.1318 N 0 0
 11.8910 -38.3345 -0.0644 C 0 0
 11.1378 -37.3023 -0.2056 N 0 0
 13.3523 -38.2703 -0.0844 C 0 0
 14.2551 -39.3846 0.0148 C 0 0
 15.4865 -38.9020 -0.0295 C 0 0
 15.3449 -37.5033 -0.1550 N 0 0
 14.0204 -37.1914 -0.1850 N 0 0
 13.8734 -40.7464 0.1271 N 0 0
 14.8000 -41.8188 0.2629 C 0 0
 14.3693 -42.9738 0.3572 O 0 0
 16.1845 -41.5985 0.3366 N 0 0
 17.0864 -42.6981 0.5502 C 0 0
 18.3964 -42.4376 -0.2141 C 0 0
 17.3591 -43.4350 -0.7714 C 0 0
 1 2 1 0 0 0
 2 3 1 0 0 0
 3 4 1 0 0 0
 4 5 1 0 0 0
 5 6 1 0 0 0
 6 1 1 0 0 0
 5 7 1 0 0 0
 7 8 1 0 0 0
 8 9 2 0 0 0
 9 10 1 0 0 0
10 11 2 0 0 0
11 12 1 0 0 0
12 13 2 0 0 0
13 8 1 0 0 0
11 14 1 0 0 0
14 15 1 0 0 0
15 16 2 0 0 0
16 12 1 0 0 0
15 17 1 0 0 0
```

```

17 18 1 0 0 0
18 19 2 0 0 0
19 20 1 0 0 0
20 21 1 0 0 0
21 17 2 0 0 0
18 22 1 0 0 0
22 23 1 0 0 0
23 24 2 0 0 0
23 25 1 0 0 0
25 26 1 0 0 0
26 27 1 0 0 0
26 28 1 0 0 0
27 28 1 0 0 0

```

M END

> <Clean Energy>

67.3204

\$\$\$\$

TAK-901

DSViewer

3D

0

```

36 40 0 0 0 0 0 0 0 0 0999 V2000
  2.3093 -12.2907 0.2880 C 0 0
  1.8876 -13.4951 -0.4710 N 0 0
  2.7603 -14.6391 -0.1591 C 0 0
  4.2135 -14.3093 -0.5450 C 0 0
  4.6943 -13.0782 0.2770 C 0 0
  3.7727 -11.8944 -0.0585 C 0 0
  0.5037 -13.8414 -0.1069 C 0 0
  6.1290 -12.7365 0.0707 N 0 0
  7.0804 -13.6821 0.1738 C 0 0
  6.7217 -14.8322 0.4445 O 0 0
  8.5737 -13.3555 0.0506 C 0 0
  9.5089 -14.3330 0.0660 C 0 0
 10.8808 -13.9899 0.0134 C 0 0
 11.3350 -12.7514 -0.0367 C 0 0
 10.3490 -11.5774 -0.0601 C 0 0
  9.0379 -11.9009 -0.0359 C 0 0
 11.9286 -14.9279 0.0273 N 0 0
 13.1034 -14.1950 -0.0224 C 0 0
 12.8406 -12.9058 -0.0666 C 0 0
 10.7339 -10.1078 -0.0628 C 0 0
 11.9817 -9.7336 0.1576 C 0 0
 12.3926 -8.3561 0.2041 C 0 0
 11.4936 -7.3949 0.0141 C 0 0
 10.0871 -7.7700 -0.2385 C 0 0
  9.7226 -9.0581 -0.2633 C 0 0
 14.0952 -7.9977 0.5653 S 0 0
 14.6712 -9.1291 1.3968 O 0 0
 14.2144 -6.6804 1.3062 O 0 0
 15.0353 -7.8925 -0.9757 C 0 0
 16.5179 -7.6219 -0.6476 C 0 0

```

|         |          |           |   |   |
|---------|----------|-----------|---|---|
| 14.3946 | -14.7105 | -0.0259 N | 0 | 0 |
| 15.3873 | -13.9101 | -0.0725 C | 0 | 0 |
| 15.1743 | -12.4454 | -0.1280 C | 0 | 0 |
| 13.9342 | -11.9550 | -0.1286 C | 0 | 0 |
| 16.3536 | -11.5241 | -0.1826 C | 0 | 0 |
| 9.2061  | -15.8112 | 0.1486 C  | 0 | 0 |

  

|    |    |   |   |   |   |
|----|----|---|---|---|---|
| 1  | 2  | 1 | 0 | 0 | 0 |
| 2  | 3  | 1 | 0 | 0 | 0 |
| 3  | 4  | 1 | 0 | 0 | 0 |
| 4  | 5  | 1 | 0 | 0 | 0 |
| 5  | 6  | 1 | 0 | 0 | 0 |
| 6  | 1  | 1 | 0 | 0 | 0 |
| 2  | 7  | 1 | 0 | 0 | 0 |
| 5  | 8  | 1 | 0 | 0 | 0 |
| 8  | 9  | 1 | 0 | 0 | 0 |
| 9  | 10 | 2 | 0 | 0 | 0 |
| 9  | 11 | 1 | 0 | 0 | 0 |
| 11 | 12 | 2 | 0 | 0 | 0 |
| 12 | 13 | 1 | 0 | 0 | 0 |
| 13 | 14 | 2 | 0 | 0 | 0 |
| 14 | 15 | 1 | 0 | 0 | 0 |
| 15 | 16 | 2 | 0 | 0 | 0 |
| 16 | 11 | 1 | 0 | 0 | 0 |
| 13 | 17 | 1 | 0 | 0 | 0 |
| 17 | 18 | 1 | 0 | 0 | 0 |
| 18 | 19 | 2 | 0 | 0 | 0 |
| 19 | 14 | 1 | 0 | 0 | 0 |
| 15 | 20 | 1 | 0 | 0 | 0 |
| 20 | 21 | 2 | 0 | 0 | 0 |
| 21 | 22 | 1 | 0 | 0 | 0 |
| 22 | 23 | 2 | 0 | 0 | 0 |
| 23 | 24 | 1 | 0 | 0 | 0 |
| 24 | 25 | 2 | 0 | 0 | 0 |
| 25 | 20 | 1 | 0 | 0 | 0 |
| 22 | 26 | 1 | 0 | 0 | 0 |
| 26 | 27 | 2 | 0 | 0 | 0 |
| 26 | 28 | 2 | 0 | 0 | 0 |
| 26 | 29 | 1 | 0 | 0 | 0 |
| 29 | 30 | 1 | 0 | 0 | 0 |
| 18 | 31 | 1 | 0 | 0 | 0 |
| 31 | 32 | 2 | 0 | 0 | 0 |
| 32 | 33 | 1 | 0 | 0 | 0 |
| 33 | 34 | 2 | 0 | 0 | 0 |
| 34 | 19 | 1 | 0 | 0 | 0 |
| 33 | 35 | 1 | 0 | 0 | 0 |
| 12 | 36 | 1 | 0 | 0 | 0 |

  
M END  
> <Clean Energy>  
42.9504  
  
\$\$\$\$  
CS2164

```

33 37 0 0 0 0 0 0 0 0 0999 V2000
  27.7371 -15.5385 0.0001 C 0 0
  27.6695 -17.0100 0.0002 C 0 0
  28.7893 -17.7215 0.0002 C 0 0
  30.0750 -17.0564 0.0002 C 0 0
  30.1426 -15.7198 0.0001 C 0 0
  28.9195 -14.9263 0.0001 C 0 0
  31.2286 -17.8416 0.0002 N 0 0
  32.3752 -17.3100 0.0002 C 0 0
  32.5027 -15.8730 0.0001 C 0 0
  31.4371 -15.0588 0.0001 C 0 0
  26.4430 -17.6787 0.0002 O 0 0
  25.3547 -16.7523 0.0002 C 0 0
  31.4740 -13.5426 0.0000 O 0 0
  32.7475 -12.7911 -0.0001 C 0 0
  33.9069 -13.4129 -0.0005 C 0 0
  35.1338 -12.7864 -0.0006 C 0 0
  35.2342 -11.4638 -0.0003 C 0 0
  33.9660 -10.6680 0.0001 C 0 0
  32.7800 -11.3052 0.0002 C 0 0
  36.2786 -13.6519 -0.0011 C 0 0
  37.4839 -13.1357 -0.0013 C 0 0
  37.6304 -11.7166 -0.0009 C 0 0
  36.6185 -10.8596 -0.0004 C 0 0
  36.8699 -9.3367 0.0001 C 0 0
  35.8636 -8.6157 0.0001 O 0 0
  38.0724 -8.6380 0.0005 N 0 0
  39.5354 -8.9709 0.0008 C 0 0
  40.0537 -10.1967 0.0017 C 0 0
  41.4844 -10.4488 0.0019 C 0 0
  42.3277 -9.4270 0.0012 C 0 0
  41.8002 -8.0671 0.0003 C 0 0
  40.4832 -7.8480 0.0001 C 0 0
  40.0054 -6.5420 -0.0008 N 0 0
1 2 1 0 0 0
2 3 2 0 0 0
3 4 1 0 0 0
4 5 2 0 0 0
5 6 1 0 0 0
6 1 2 0 0 0
4 7 1 0 0 0
7 8 2 0 0 0
8 9 1 0 0 0
9 10 2 0 0 0
10 5 1 0 0 0
2 11 1 0 0 0
11 12 1 0 0 0
10 13 1 0 0 0
13 14 1 0 0 0
14 15 2 0 0 0

```

```

15 16 1 0 0 0
16 17 2 0 0 0
17 18 1 0 0 0
18 19 2 0 0 0
19 14 1 0 0 0
16 20 1 0 0 0
20 21 2 0 0 0
21 22 1 0 0 0
22 23 2 0 0 0
23 17 1 0 0 0
23 24 1 0 0 0
24 25 2 0 0 0
24 26 1 0 0 0
26 27 1 0 0 0
27 28 2 0 0 0
28 29 1 0 0 0
29 30 2 0 0 0
30 31 1 0 0 0
31 32 2 0 0 0
32 27 1 0 0 0
32 33 1 0 0 0

```

M END

> <Clean Energy>

30.5624

\$\$\$

SP-96

DSViewer

3D

0

```

34 38 0 0 0 0 0 0 0 0 0999 V2000
  43.9350 -31.2017 -0.0030 C 0 0
  44.0318 -32.5336 -0.0019 C 0 0
  45.3413 -33.1893 0.0005 C 0 0
  46.4521 -32.4564 0.0016 C 0 0
  46.3594 -30.9954 0.0005 C 0 0
  45.1664 -30.3995 -0.0017 C 0 0
  42.6630 -30.5299 -0.0059 N 0 0
  45.4204 -34.5288 0.0013 F 0 0
  41.3991 -31.2005 -0.0038 C 0 0
  41.3521 -32.4347 0.0020 O 0 0
  40.1863 -30.4226 -0.0078 N 0 0
  38.8672 -31.0007 -0.0040 C 0 0
  37.7852 -30.2098 -0.0096 C 0 0
  36.4184 -30.8117 -0.0036 C 0 0
  36.2931 -32.1368 0.0081 C 0 0
  37.4668 -32.9935 0.0128 C 0 0
  38.6822 -32.4587 0.0073 C 0 0
  35.2123 -30.0426 -0.0047 N 0 0
  35.1192 -28.6313 -0.0383 C 0 0
  36.1492 -27.8859 -0.1000 N 0 0
  36.0483 -26.4659 -0.1337 C 0 0
  34.9251 -25.8580 -0.1023 N 0 0

```

|         |          |         |   |   |   |
|---------|----------|---------|---|---|---|
| 33.7379 | -26.5736 | -0.0319 | C | 0 | 0 |
| 33.8025 | -28.0084 | 0.0003  | C | 0 | 0 |
| 32.5625 | -25.9472 | 0.0080  | C | 0 | 0 |
| 31.3233 | -26.7251 | 0.0873  | C | 0 | 0 |
| 31.3792 | -28.0573 | 0.1150  | C | 0 | 0 |
| 32.6870 | -28.7343 | 0.0678  | C | 0 | 0 |
| 30.0319 | -26.0319 | 0.1501  | C | 0 | 0 |
| 29.8793 | -24.6072 | 0.1188  | C | 0 | 0 |
| 28.6361 | -24.3546 | 0.1802  | N | 0 | 0 |
| 27.8633 | -25.5906 | 0.3036  | C | 0 | 0 |
| 28.9066 | -26.6041 | 0.2297  | N | 0 | 0 |
| 26.8444 | -25.7348 | -0.8410 | C | 0 | 0 |
| 1       | 2        | 2       | 0 | 0 | 0 |
| 2       | 3        | 1       | 0 | 0 | 0 |
| 3       | 4        | 2       | 0 | 0 | 0 |
| 4       | 5        | 1       | 0 | 0 | 0 |
| 5       | 6        | 2       | 0 | 0 | 0 |
| 6       | 1        | 1       | 0 | 0 | 0 |
| 1       | 7        | 1       | 0 | 0 | 0 |
| 3       | 8        | 1       | 0 | 0 | 0 |
| 7       | 9        | 1       | 0 | 0 | 0 |
| 9       | 10       | 2       | 0 | 0 | 0 |
| 9       | 11       | 1       | 0 | 0 | 0 |
| 11      | 12       | 1       | 0 | 0 | 0 |
| 12      | 13       | 2       | 0 | 0 | 0 |
| 13      | 14       | 1       | 0 | 0 | 0 |
| 14      | 15       | 2       | 0 | 0 | 0 |
| 15      | 16       | 1       | 0 | 0 | 0 |
| 16      | 17       | 2       | 0 | 0 | 0 |
| 17      | 12       | 1       | 0 | 0 | 0 |
| 14      | 18       | 1       | 0 | 0 | 0 |
| 18      | 19       | 1       | 0 | 0 | 0 |
| 19      | 20       | 2       | 0 | 0 | 0 |
| 20      | 21       | 1       | 0 | 0 | 0 |
| 21      | 22       | 2       | 0 | 0 | 0 |
| 22      | 23       | 1       | 0 | 0 | 0 |
| 23      | 24       | 1       | 0 | 0 | 0 |
| 24      | 19       | 1       | 0 | 0 | 0 |
| 23      | 25       | 2       | 0 | 0 | 0 |
| 25      | 26       | 1       | 0 | 0 | 0 |
| 26      | 27       | 2       | 0 | 0 | 0 |
| 27      | 28       | 1       | 0 | 0 | 0 |
| 28      | 24       | 2       | 0 | 0 | 0 |
| 26      | 29       | 1       | 0 | 0 | 0 |
| 29      | 30       | 1       | 0 | 0 | 0 |
| 30      | 31       | 2       | 0 | 0 | 0 |
| 31      | 32       | 1       | 0 | 0 | 0 |
| 32      | 33       | 1       | 0 | 0 | 0 |
| 33      | 29       | 2       | 0 | 0 | 0 |
| 32      | 34       | 1       | 0 | 0 | 0 |

M END

> <Clean Energy>



16.5824

\$\$\$

PHA-680632

DSViewer

3D

0

```
37 41 0 0 0 0 0 0 0 0 0999 V2000
  3.1358 -42.6134 0.2764 C 0 0
  4.5943 -42.8263 -0.1717 C 0 0
  5.3985 -41.6226 -0.0522 N 0 0
  4.8014 -40.3004 -0.1465 C 0 0
  3.3275 -40.2787 0.2995 C 0 0
  2.5913 -41.3872 -0.3073 N 0 0
  1.1777 -41.2748 0.0740 C 0 0
  6.7950 -41.7338 -0.0255 C 0 0
  7.3771 -42.9343 -0.0285 C 0 0
  8.8401 -43.0445 -0.0107 C 0 0
  9.5827 -41.9396 0.0086 C 0 0
  8.9433 -40.6239 0.0152 C 0 0
  7.6179 -40.5245 -0.0010 C 0 0
 11.0332 -42.0162 0.0176 C 0 0
 11.6757 -40.9593 0.0311 O 0 0
 11.6727 -43.1916 0.0061 N 0 0
 13.0734 -43.1847 0.0071 C 0 0
 13.9713 -44.3069 0.0004 C 0 0
 15.1597 -43.8384 0.0003 C 0 0
 15.1428 -42.4642 0.0072 N 0 0
 13.7966 -42.1157 0.0109 N 0 0
 13.8717 -45.8001 -0.0061 C 0 0
 15.3709 -46.0350 -0.0086 N 0 0
 16.2194 -44.8133 -0.0067 C 0 0
 16.0200 -47.2746 -0.0104 C 0 0
 17.2407 -47.2069 -0.0121 O 0 0
 15.3240 -48.5388 -0.0055 N 0 0
 15.8613 -49.9419 -0.0004 C 0 0
 14.9264 -50.9009 0.0015 C 0 0
 15.2877 -52.3244 0.0069 C 0 0
 16.5555 -52.7103 0.0103 C 0 0
 17.6112 -51.7263 0.0086 C 0 0
 17.3515 -50.4187 0.0036 C 0 0
 18.5622 -49.5151 0.0029 C 0 0
 19.8781 -50.3202 0.0076 C 0 0
 13.4710 -50.5223 -0.0018 C 0 0
 12.5969 -51.7976 0.0016 C 0 0
1 2 1 0 0 0
2 3 1 0 0 0
3 4 1 0 0 0
4 5 1 0 0 0
5 6 1 0 0 0
6 1 1 0 0 0
6 7 1 0 0 0
3 8 1 0 0 0
```

```

8 9 2 0 0 0
9 10 1 0 0 0
10 11 2 0 0 0
11 12 1 0 0 0
12 13 2 0 0 0
13 8 1 0 0 0
11 14 1 0 0 0
14 15 2 0 0 0
14 16 1 0 0 0
16 17 1 0 0 0
17 18 1 0 0 0
18 19 2 0 0 0
19 20 1 0 0 0
20 21 1 0 0 0
21 17 2 0 0 0
18 22 1 0 0 0
22 23 1 0 0 0
23 24 1 0 0 0
24 19 1 0 0 0
23 25 1 0 0 0
25 26 2 0 0 0
25 27 1 0 0 0
27 28 1 0 0 0
28 29 2 0 0 0
29 30 1 0 0 0
30 31 2 0 0 0
31 32 1 0 0 0
32 33 2 0 0 0
33 28 1 0 0 0
33 34 1 0 0 0
34 35 1 0 0 0
29 36 1 0 0 0
36 37 1 0 0 0

```

M END

> <Clean Energy>

51.1074

\$\$\$\$

CCT129202

DSViewer

3D

0

```

34 38 0 0 0 0 0 0 0 0 0999 V2000
7.0406 -32.3070 0.0350 C 0 0
7.2146 -33.6329 0.0630 C 0 0
8.4835 -34.2041 0.0527 N 0 0
9.4975 -33.4511 0.0089 C 0 0
9.4522 -32.0504 -0.0296 C 0 0
8.2830 -31.3837 -0.0187 C 0 0
10.7881 -33.8446 0.0023 N 0 0
11.5444 -32.6535 -0.0334 C 0 0
10.8029 -31.5951 -0.0561 N 0 0
13.0107 -32.6926 -0.0326 C 0 0

```

|         |          |         |    |   |   |
|---------|----------|---------|----|---|---|
| 8.1946  | -29.8974 | -0.0473 | N  | 0 | 0 |
| 5.3863  | -31.7622 | 0.0368  | C1 | 0 | 0 |
| 13.6072 | -33.8832 | -0.0039 | C  | 0 | 0 |
| 15.0610 | -33.9867 | 0.0046  | C  | 0 | 0 |
| 15.8064 | -32.8847 | -0.0143 | C  | 0 | 0 |
| 15.1526 | -31.5615 | -0.0451 | C  | 0 | 0 |
| 13.8195 | -31.4702 | -0.0543 | C  | 0 | 0 |
| 17.2099 | -32.9918 | -0.0048 | N  | 0 | 0 |
| 17.8360 | -34.2884 | 0.0222  | C  | 0 | 0 |
| 18.0248 | -31.8111 | -0.0217 | C  | 0 | 0 |
| 9.3539  | -29.0878 | -0.4169 | C  | 0 | 0 |
| 9.2514  | -27.6088 | 0.0541  | C  | 0 | 0 |
| 7.9165  | -27.0305 | -0.1991 | N  | 0 | 0 |
| 7.0098  | -27.7934 | 0.6420  | C  | 0 | 0 |
| 6.9124  | -29.2343 | 0.1235  | C  | 0 | 0 |
| 7.9637  | -25.5969 | 0.2200  | C  | 0 | 0 |
| 6.6425  | -24.8092 | 0.1406  | C  | 0 | 0 |
| 6.6850  | -23.5909 | 0.3366  | O  | 0 | 0 |
| 5.4605  | -25.3979 | -0.0914 | N  | 0 | 0 |
| 4.2458  | -24.6576 | -0.1230 | C  | 0 | 0 |
| 4.1282  | -22.9202 | -0.0035 | S  | 0 | 0 |
| 2.3936  | -22.9797 | -0.1027 | C  | 0 | 0 |
| 2.0031  | -24.2546 | -0.2168 | C  | 0 | 0 |
| 3.0955  | -25.2028 | -0.2254 | N  | 0 | 0 |
| 1       | 2        | 2       | 0  | 0 | 0 |
| 2       | 3        | 1       | 0  | 0 | 0 |
| 3       | 4        | 2       | 0  | 0 | 0 |
| 4       | 5        | 1       | 0  | 0 | 0 |
| 5       | 6        | 2       | 0  | 0 | 0 |
| 6       | 1        | 1       | 0  | 0 | 0 |
| 4       | 7        | 1       | 0  | 0 | 0 |
| 7       | 8        | 1       | 0  | 0 | 0 |
| 8       | 9        | 2       | 0  | 0 | 0 |
| 9       | 5        | 1       | 0  | 0 | 0 |
| 8       | 10       | 1       | 0  | 0 | 0 |
| 6       | 11       | 1       | 0  | 0 | 0 |
| 1       | 12       | 1       | 0  | 0 | 0 |
| 10      | 13       | 2       | 0  | 0 | 0 |
| 13      | 14       | 1       | 0  | 0 | 0 |
| 14      | 15       | 2       | 0  | 0 | 0 |
| 15      | 16       | 1       | 0  | 0 | 0 |
| 16      | 17       | 2       | 0  | 0 | 0 |
| 17      | 10       | 1       | 0  | 0 | 0 |
| 15      | 18       | 1       | 0  | 0 | 0 |
| 18      | 19       | 1       | 0  | 0 | 0 |
| 18      | 20       | 1       | 0  | 0 | 0 |
| 11      | 21       | 1       | 0  | 0 | 0 |
| 21      | 22       | 1       | 0  | 0 | 0 |
| 22      | 23       | 1       | 0  | 0 | 0 |
| 23      | 24       | 1       | 0  | 0 | 0 |
| 24      | 25       | 1       | 0  | 0 | 0 |
| 25      | 11       | 1       | 0  | 0 | 0 |

```

23 26 1 0 0 0
26 27 1 0 0 0
27 28 2 0 0 0
27 29 1 0 0 0
29 30 1 0 0 0
30 31 1 0 0 0
31 32 1 0 0 0
32 33 2 0 0 0
33 34 1 0 0 0
34 30 2 0 0 0

```

M END

> <Clean Energy>

46.0117

\$\$\$\$

CCT137690

DSViewer

3D

0

```

36 41 0 0 0 0 0 0 0 0999 V2000
  12.1167 -17.8968 -0.0179 C 0 0
  12.3074 -19.2198 -0.0431 C 0 0
  13.5798 -19.7789 -0.0349 N 0 0
  14.5872 -19.0190 0.0007 C 0 0
  14.5349 -17.6179 0.0328 C 0 0
  13.3594 -16.9547 0.0267 C 0 0
  15.8820 -19.4056 0.0059 N 0 0
  16.6338 -18.2119 0.0350 C 0 0
  15.8856 -17.1564 0.0539 N 0 0
  18.1052 -18.2422 0.0295 C 0 0
  18.7105 -19.4296 0.0023 C 0 0
  20.1676 -19.5234 -0.0176 C 0 0
  20.9074 -18.4171 -0.0106 C 0 0
  20.2433 -17.0979 0.0218 C 0 0
  18.9090 -17.0153 0.0413 C 0 0
  22.3160 -18.5159 -0.0404 N 0 0
  22.9285 -19.8332 -0.1656 C 0 0
  24.4070 -19.8519 0.2751 C 0 0
  25.1323 -18.7241 -0.3096 N 0 0
  24.5762 -17.5154 0.3020 C 0 0
  23.1103 -17.3043 -0.1353 C 0 0
  26.5496 -18.8317 0.0658 C 0 0
  10.2745 -17.3449 -0.0272 Br 0 0
  13.2734 -15.4624 0.0516 N 0 0
  14.4571 -14.6434 0.3163 C 0 0
  14.3259 -13.1808 -0.2061 C 0 0
  13.0210 -12.5908 0.1402 N 0 0
  12.0382 -13.3772 -0.5867 C 0 0
  11.9874 -14.7996 -0.0204 C 0 0
  12.9973 -11.1746 -0.3289 C 0 0
  11.6710 -10.4542 -0.0645 C 0 0
  11.4545 -9.0789 -0.3307 C 0 0
  10.2026 -8.8765 0.0388 C 0 0

```

|         |          |         |   |   |   |
|---------|----------|---------|---|---|---|
| 9.5931  | -10.0572 | 0.5315  | 0 | 0 | 0 |
| 10.6139 | -10.9755 | 0.4204  | N | 0 | 0 |
| 9.5063  | -7.5478  | -0.0499 | C | 0 | 0 |

  

|    |    |   |   |   |   |
|----|----|---|---|---|---|
| 1  | 2  | 2 | 0 | 0 | 0 |
| 2  | 3  | 1 | 0 | 0 | 0 |
| 3  | 4  | 2 | 0 | 0 | 0 |
| 4  | 5  | 1 | 0 | 0 | 0 |
| 5  | 6  | 2 | 0 | 0 | 0 |
| 6  | 1  | 1 | 0 | 0 | 0 |
| 4  | 7  | 1 | 0 | 0 | 0 |
| 7  | 8  | 1 | 0 | 0 | 0 |
| 8  | 9  | 2 | 0 | 0 | 0 |
| 9  | 5  | 1 | 0 | 0 | 0 |
| 8  | 10 | 1 | 0 | 0 | 0 |
| 10 | 11 | 2 | 0 | 0 | 0 |
| 11 | 12 | 1 | 0 | 0 | 0 |
| 12 | 13 | 2 | 0 | 0 | 0 |
| 13 | 14 | 1 | 0 | 0 | 0 |
| 14 | 15 | 2 | 0 | 0 | 0 |
| 15 | 10 | 1 | 0 | 0 | 0 |
| 13 | 16 | 1 | 0 | 0 | 0 |
| 16 | 17 | 1 | 0 | 0 | 0 |
| 17 | 18 | 1 | 0 | 0 | 0 |
| 18 | 19 | 1 | 0 | 0 | 0 |
| 19 | 20 | 1 | 0 | 0 | 0 |
| 20 | 21 | 1 | 0 | 0 | 0 |
| 21 | 16 | 1 | 0 | 0 | 0 |
| 19 | 22 | 1 | 0 | 0 | 0 |
| 1  | 23 | 1 | 0 | 0 | 0 |
| 6  | 24 | 1 | 0 | 0 | 0 |
| 24 | 25 | 1 | 0 | 0 | 0 |
| 25 | 26 | 1 | 0 | 0 | 0 |
| 26 | 27 | 1 | 0 | 0 | 0 |
| 27 | 28 | 1 | 0 | 0 | 0 |
| 28 | 29 | 1 | 0 | 0 | 0 |
| 29 | 24 | 1 | 0 | 0 | 0 |
| 27 | 30 | 1 | 0 | 0 | 0 |
| 30 | 31 | 1 | 0 | 0 | 0 |
| 31 | 32 | 1 | 0 | 0 | 0 |
| 32 | 33 | 2 | 0 | 0 | 0 |
| 33 | 34 | 1 | 0 | 0 | 0 |
| 34 | 35 | 1 | 0 | 0 | 0 |
| 35 | 31 | 2 | 0 | 0 | 0 |
| 33 | 36 | 1 | 0 | 0 | 0 |

M END

> <Clean Energy>

50.2654

\$\$\$

GSK650394

DSViewer

3D

0

|         |          |         |   |   |   |   |   |   |   |      |       |
|---------|----------|---------|---|---|---|---|---|---|---|------|-------|
| 29      | 33       | 0       | 0 | 0 | 0 | 0 | 0 | 0 | 0 | 0999 | V2000 |
| 28.4360 | -44.6472 | 0.0166  | C | 0 | 0 |   |   |   |   |      |       |
| 28.5244 | -46.1099 | 0.0096  | C | 0 | 0 |   |   |   |   |      |       |
| 29.7162 | -46.7054 | 0.0143  | C | 0 | 0 |   |   |   |   |      |       |
| 30.9406 | -45.8985 | 0.0264  | C | 0 | 0 |   |   |   |   |      |       |
| 30.8595 | -44.5680 | 0.0326  | C | 0 | 0 |   |   |   |   |      |       |
| 29.5476 | -43.9132 | 0.0278  | C | 0 | 0 |   |   |   |   |      |       |
| 32.2518 | -46.5536 | 0.0270  | C | 0 | 0 |   |   |   |   |      |       |
| 32.3393 | -47.8919 | 0.0134  | C | 0 | 0 |   |   |   |   |      |       |
| 33.6110 | -48.5314 | 0.0051  | N | 0 | 0 |   |   |   |   |      |       |
| 34.6588 | -47.8103 | 0.0114  | C | 0 | 0 |   |   |   |   |      |       |
| 34.6259 | -46.4237 | 0.0279  | C | 0 | 0 |   |   |   |   |      |       |
| 33.4831 | -45.7517 | 0.0349  | C | 0 | 0 |   |   |   |   |      |       |
| 36.5127 | -44.5461 | 0.0087  | C | 0 | 0 |   |   |   |   |      |       |
| 37.8236 | -44.2962 | -0.0753 | C | 0 | 0 |   |   |   |   |      |       |
| 38.3410 | -42.8980 | -0.1326 | C | 0 | 0 |   |   |   |   |      |       |
| 37.4490 | -41.8758 | -0.1061 | C | 0 | 0 |   |   |   |   |      |       |
| 36.0263 | -42.1835 | 0.0168  | C | 0 | 0 |   |   |   |   |      |       |
| 35.5878 | -43.4324 | 0.0670  | C | 0 | 0 |   |   |   |   |      |       |
| 37.7647 | -40.4107 | -0.2221 | C | 0 | 0 |   |   |   |   |      |       |
| 36.8317 | -39.6070 | -0.1233 | O | 0 | 0 |   |   |   |   |      |       |
| 39.0294 | -39.9169 | -0.5193 | O | 0 | 0 |   |   |   |   |      |       |
| 39.8680 | -42.7137 | -0.2497 | C | 0 | 0 |   |   |   |   |      |       |
| 40.6409 | -44.0221 | -0.1841 | C | 0 | 0 |   |   |   |   |      |       |
| 42.1098 | -43.5117 | -0.1534 | C | 0 | 0 |   |   |   |   |      |       |
| 42.0097 | -42.0859 | 0.4895  | C | 0 | 0 |   |   |   |   |      |       |
| 40.5336 | -41.9803 | 0.9190  | C | 0 | 0 |   |   |   |   |      |       |
| 35.9893 | -48.2310 | -0.0031 | N | 0 | 0 |   |   |   |   |      |       |
| 36.8136 | -47.0381 | -0.0045 | C | 0 | 0 |   |   |   |   |      |       |
| 36.0188 | -45.9598 | 0.0191  | C | 0 | 0 |   |   |   |   |      |       |
| 1       | 2        | 1       | 0 | 0 | 0 |   |   |   |   |      |       |
| 2       | 3        | 2       | 0 | 0 | 0 |   |   |   |   |      |       |
| 3       | 4        | 1       | 0 | 0 | 0 |   |   |   |   |      |       |
| 4       | 5        | 2       | 0 | 0 | 0 |   |   |   |   |      |       |
| 5       | 6        | 1       | 0 | 0 | 0 |   |   |   |   |      |       |
| 6       | 1        | 2       | 0 | 0 | 0 |   |   |   |   |      |       |
| 4       | 7        | 1       | 0 | 0 | 0 |   |   |   |   |      |       |
| 7       | 8        | 2       | 0 | 0 | 0 |   |   |   |   |      |       |
| 8       | 9        | 1       | 0 | 0 | 0 |   |   |   |   |      |       |
| 9       | 10       | 2       | 0 | 0 | 0 |   |   |   |   |      |       |
| 10      | 11       | 1       | 0 | 0 | 0 |   |   |   |   |      |       |
| 11      | 12       | 2       | 0 | 0 | 0 |   |   |   |   |      |       |
| 12      | 7        | 1       | 0 | 0 | 0 |   |   |   |   |      |       |
| 13      | 14       | 2       | 0 | 0 | 0 |   |   |   |   |      |       |
| 14      | 15       | 1       | 0 | 0 | 0 |   |   |   |   |      |       |
| 15      | 16       | 2       | 0 | 0 | 0 |   |   |   |   |      |       |
| 16      | 17       | 1       | 0 | 0 | 0 |   |   |   |   |      |       |
| 17      | 18       | 2       | 0 | 0 | 0 |   |   |   |   |      |       |
| 18      | 13       | 1       | 0 | 0 | 0 |   |   |   |   |      |       |
| 16      | 19       | 1       | 0 | 0 | 0 |   |   |   |   |      |       |
| 19      | 20       | 2       | 0 | 0 | 0 |   |   |   |   |      |       |
| 19      | 21       | 1       | 0 | 0 | 0 |   |   |   |   |      |       |

```

15 22  1  0  0  0
22 23  1  0  0  0
23 24  1  0  0  0
24 25  1  0  0  0
25 26  1  0  0  0
26 22  1  0  0  0
10 27  1  0  0  0
27 28  1  0  0  0
28 29  2  0  0  0
29 11  1  0  0  0
29 13  1  0  0  0

```

M END

> <Clean Energy>

50.553

\$\$\$\$

ABT-348

DSViewer

3D

0

```

35 39  0  0  0  0  0  0  0  0  0999 V2000
 41.9345 -64.1487  0.0002 C  0  0
 42.3224 -65.5700  0.0002 C  0  0
 43.6052 -65.9225  0.0001 C  0  0
 44.6442 -64.8951  0.0001 C  0  0
 44.3039 -63.6074  0.0002 C  0  0
 42.8880 -63.2177  0.0002 C  0  0
 43.9422 -67.2206  0.0001 F  0  0
 40.5668 -63.7393  0.0002 N  0  0
 39.4658 -64.6443  0.0005 C  0  0
 38.1203 -64.1984  0.0005 N  0  0
 39.6525 -65.8652  0.0008 O  0  0
 37.6750 -62.8525  0.0001 C  0  0
 38.5056 -61.8105 -0.0006 C  0  0
 37.9643 -60.4414 -0.0010 C  0  0
 36.6455 -60.2279 -0.0006 C  0  0
 35.7589 -61.3749  0.0002 C  0  0
 36.2391 -62.6136  0.0005 C  0  0
 36.1566 -58.8053 -0.0008 C  0  0
 37.0656 -57.8223 -0.0012 C  0  0
 36.2879 -56.2537 -0.0011 S  0  0
 34.6795 -56.9274 -0.0004 C  0  0
 34.6980 -58.2523 -0.0003 C  0  0
 33.4160 -56.1801  0.0001 C  0  0
 32.2820 -56.8781  0.0005 C  0  0
 32.2968 -58.2941  0.0005 N  0  0
 33.3798 -58.9729  0.0001 C  0  0
 33.3561 -54.6992  0.0004 C  0  0
 34.4899 -53.7881  0.0005 C  0  0
 34.0259 -52.6002  0.0009 N  0  0
 32.6823 -52.6618  0.0010 N  0  0
 32.2395 -53.9865  0.0007 C  0  0
 31.8311 -51.4996  0.0010 C  0  0

```

```

30.3457 -51.9035 -0.0005 C 0 0
29.5386 -50.7220 -0.0005 O 0 0
33.2710 -60.3486 0.0001 N 0 0
1 2 1 0 0 0
2 3 2 0 0 0
3 4 1 0 0 0
4 5 2 0 0 0
5 6 1 0 0 0
6 1 2 0 0 0
3 7 1 0 0 0
1 8 1 0 0 0
8 9 1 0 0 0
9 10 1 0 0 0
9 11 2 0 0 0
10 12 1 0 0 0
12 13 2 0 0 0
13 14 1 0 0 0
14 15 2 0 0 0
15 16 1 0 0 0
16 17 2 0 0 0
17 12 1 0 0 0
15 18 1 0 0 0
18 19 2 0 0 0
19 20 1 0 0 0
20 21 1 0 0 0
21 22 2 0 0 0
22 18 1 0 0 0
21 23 1 0 0 0
23 24 2 0 0 0
24 25 1 0 0 0
25 26 2 0 0 0
26 22 1 0 0 0
23 27 1 0 0 0
27 28 1 0 0 0
28 29 2 0 0 0
29 30 1 0 0 0
30 31 1 0 0 0
31 27 2 0 0 0
30 32 1 0 0 0
32 33 1 0 0 0
33 34 1 0 0 0
26 35 1 0 0 0
M END
> <Clean Energy>
37.714

$$$$
Barasertib
DSViewer 3D 0

37 40 0 0 0 0 0 0 0 0999 V2000
32.5270 31.1120 65.3050 C 0 0

```



|         |         |         |   |   |   |
|---------|---------|---------|---|---|---|
| 32.2690 | 32.2650 | 65.9990 | C | 0 | 0 |
| 33.2000 | 33.5840 | 65.7350 | F | 0 | 0 |
| 31.2010 | 32.2310 | 66.8680 | C | 0 | 0 |
| 30.4380 | 31.0680 | 67.0530 | C | 0 | 0 |
| 30.7300 | 29.9040 | 66.3240 | C | 0 | 0 |
| 31.7970 | 29.9120 | 65.4830 | C | 0 | 0 |
| 32.0340 | 28.8450 | 64.7440 | N | 0 | 0 |
| 32.9570 | 28.8630 | 63.7820 | C | 0 | 0 |
| 33.8900 | 29.6780 | 63.7720 | O | 0 | 0 |
| 32.8960 | 27.6130 | 62.8170 | C | 0 | 0 |
| 34.2960 | 27.7230 | 62.0500 | C | 0 | 0 |
| 35.2190 | 26.7600 | 61.8620 | C | 0 | 0 |
| 34.7600 | 28.8220 | 61.4610 | N | 0 | 0 |
| 36.0130 | 28.5410 | 60.9260 | N | 0 | 0 |
| 36.2940 | 27.2430 | 61.1920 | C | 0 | 0 |
| 37.4880 | 26.6380 | 60.8010 | N | 0 | 0 |
| 37.6460 | 25.2750 | 60.7470 | C | 0 | 0 |
| 36.8640 | 24.5180 | 61.5640 | N | 0 | 0 |
| 37.0040 | 23.1840 | 61.4170 | C | 0 | 0 |
| 37.9660 | 22.5560 | 60.6420 | N | 0 | 0 |
| 38.8020 | 23.2710 | 59.8280 | C | 0 | 0 |
| 39.7050 | 22.5990 | 58.9080 | C | 0 | 0 |
| 38.6570 | 24.6980 | 59.8930 | C | 0 | 0 |
| 39.5060 | 25.4290 | 59.0080 | C | 0 | 0 |
| 40.4260 | 24.7750 | 58.1760 | C | 0 | 0 |
| 40.5780 | 23.3830 | 58.1480 | C | 0 | 0 |
| 41.5500 | 22.8750 | 57.3060 | O | 0 | 0 |
| 42.2750 | 21.6740 | 57.4800 | C | 0 | 0 |
| 42.1010 | 21.0780 | 56.0930 | C | 0 | 0 |
| 43.4310 | 20.6320 | 55.5200 | C | 0 | 0 |
| 43.2650 | 20.6530 | 54.0380 | N | 0 | 0 |
| 44.0810 | 19.6140 | 53.3780 | C | 0 | 0 |
| 43.1770 | 18.3790 | 53.1460 | C | 0 | 0 |
| 43.5660 | 22.0130 | 53.5480 | C | 0 | 0 |
| 43.0520 | 22.1710 | 52.1070 | C | 0 | 0 |
| 42.1460 | 23.3070 | 52.1060 | O | 0 | 0 |
| 1       | 2       | 4       | 0 | 0 | 0 |
| 1       | 7       | 4       | 0 | 0 | 0 |
| 2       | 3       | 1       | 0 | 0 | 0 |
| 2       | 4       | 4       | 0 | 0 | 0 |
| 4       | 5       | 4       | 0 | 0 | 0 |
| 5       | 6       | 4       | 0 | 0 | 0 |
| 6       | 7       | 4       | 0 | 0 | 0 |
| 7       | 8       | 1       | 0 | 0 | 0 |
| 8       | 9       | 1       | 0 | 0 | 0 |
| 9       | 10      | 2       | 0 | 0 | 0 |
| 9       | 11      | 1       | 0 | 0 | 0 |
| 11      | 12      | 1       | 0 | 0 | 0 |
| 12      | 13      | 2       | 0 | 0 | 0 |
| 12      | 14      | 1       | 0 | 0 | 0 |
| 13      | 16      | 1       | 0 | 0 | 0 |
| 14      | 15      | 1       | 0 | 0 | 0 |

|    |    |   |   |   |   |
|----|----|---|---|---|---|
| 15 | 16 | 2 | 0 | 0 | 0 |
| 16 | 17 | 1 | 0 | 0 | 0 |
| 17 | 18 | 1 | 0 | 0 | 0 |
| 18 | 19 | 4 | 0 | 0 | 0 |
| 18 | 24 | 4 | 0 | 0 | 0 |
| 19 | 20 | 4 | 0 | 0 | 0 |
| 20 | 21 | 4 | 0 | 0 | 0 |
| 21 | 22 | 4 | 0 | 0 | 0 |
| 22 | 23 | 4 | 0 | 0 | 0 |
| 22 | 24 | 4 | 0 | 0 | 0 |
| 23 | 27 | 4 | 0 | 0 | 0 |
| 24 | 25 | 4 | 0 | 0 | 0 |
| 25 | 26 | 4 | 0 | 0 | 0 |
| 26 | 27 | 4 | 0 | 0 | 0 |
| 27 | 28 | 1 | 0 | 0 | 0 |
| 28 | 29 | 1 | 0 | 0 | 0 |
| 29 | 30 | 1 | 0 | 0 | 0 |
| 30 | 31 | 1 | 0 | 0 | 0 |
| 31 | 32 | 1 | 0 | 0 | 0 |
| 32 | 33 | 1 | 0 | 0 | 0 |
| 32 | 35 | 1 | 0 | 0 | 0 |
| 33 | 34 | 1 | 0 | 0 | 0 |
| 35 | 36 | 1 | 0 | 0 | 0 |
| 36 | 37 | 1 | 0 | 0 | 0 |

M END

> <Resolution>

1.49

\$\$\$\$
