# Supplementary material for: Aurora B Inhibitors as Cancer Therapeutics
Source: MDPI journal article supplement (doi:10.3390/molecules28083385), 2023-04-11
Supplement: s1 [file s1]

## Aurora B Inhibitors as Cancer Therapeutics

Antal H. Kovacs <sup>1</sup>, Dong Zhao <sup>1</sup> and Jinqiang Hou <sup>1,2,\*</sup>

<sup>1</sup> Department of Chemistry, Lakehead University, 955 Oliver Road, Thunder Bay, ON P7B 5E1, Canada

<sup>2</sup> Thunder Bay Regional Health Research Institute, 980 Oliver Road, Thunder Bay, ON P7B 6V4, Canada

\* Correspondence: jhou3@lakeheadu.ca

Table S1: Comprehensive list of IC<sub>50</sub> data for Aurora B inhibitors reported in literature

AZD1152 *in vitro* IC<sub>50</sub> values

| Malignancy                                                     | Cell Line | IC <sub>50</sub> (nM) | Reference |
|----------------------------------------------------------------|-----------|-----------------------|-----------|
| Adult lymphoblastic Leukemia: Philadelphia chromosome-positive | PALL-2    | 5                     | 1         |
| Acute monocytic leukemia                                       | MOLM13    | 12                    | 1         |
| Biphenotypic leukemia                                          | MV4-11    | 8                     | 1         |
| Androgen-sensitive human prostatic adenocarcinoma              | LNCaP     | 25                    | 2         |
| Androgen-independent advanced human prostatic adenocarcinoma   | PC-3      | 10                    | 2         |
| Human retinoblastoma                                           | Y-79      | 39.38                 | 3         |
| Patient-derived retinoblastoma cells                           | LRB1      | 38.41                 | 3         |
| Patient-derived retinoblastoma cells                           | LRB2      | 32.39                 | 3         |
| Hepatocellular carcinoma                                       | Huh-7     | 16.72                 | 4         |
| Hepatocellular carcinoma                                       | Hep3B     | 4.79                  | 4         |
| Lung adenocarcinoma                                            | A549      | 0.9                   | 5         |
| Lung adenocarcinoma                                            | A549      | 20.16                 | 6         |

| Malignancy                         | Cell Line  | IC <sub>50</sub> (nM) | Reference |
|------------------------------------|------------|-----------------------|-----------|
| Lung squamous cell carcinoma       | SK-MES1    | 1.2                   | 5         |
| Lung adenocarcinoma                | SKLU1      | 2.3                   | 5         |
| Osteosarcoma                       | U2OS       | 146                   | 7         |
| Undifferentiated human liposarcoma | SW-872     | 43.4                  | 8         |
| Differentiated human liposarcoma   | 93T449     | 74.5                  | 8         |
| Colon carcinoma                    | HCT116     | 20.12                 | 6         |
| Colorectal adenocarcinoma          | HT-29      | 150                   | 6         |
| Anaplastic osteosarcoma            | SK-ES-1    | 5                     | 9         |
| Anaplastic osteosarcoma            | A4573      | 6                     | 9         |
| Anaplastic osteosarcoma            | A673       | 5000                  | 9         |
| Breast adenocarcinoma              | MDA-MB-468 | 14                    | 10        |
| Amelanotic melanoma                | MDA-MB-435 | 125                   | 10        |
| Breast adenocarcinoma              | MDA-MB-231 | 105                   | 10        |
| Breast adenocarcinoma              | MDA-MB-361 | 70                    | 10        |
| Breast carcinoma                   | BT-474     | 8                     | 10        |
| Anaplastic thyroid carcinoma       | CAL-62     | 9.2                   | 11        |
| Anaplastic thyroid carcinoma       | BHT-101    | 461.3                 | 11        |
| Anaplastic thyroid carcinoma       | 8305C      | 287.8                 | 11        |

| Malignancy                             | Cell Line | IC <sub>50</sub> (nM) | Reference |
|----------------------------------------|-----------|-----------------------|-----------|
| Anaplastic thyroid carcinoma           | 8505C     | 26.7                  | 11        |
| Hereditary thyroid medullary carcinoma | TT        | 401.6                 | 12        |
| Adult hepatocellular carcinoma         | JHH-1     | 17.4                  | 13        |
| Adult hepatocellular carcinoma         | JHH-2     | 218.0                 | 13        |
| Adult hepatocellular carcinoma         | JHH-4     | 155.6                 | 13        |
| Adult hepatocellular carcinoma         | HuH-1     | 27.3                  | 13        |
| Hepatoblastoma                         | HuH-6     | 3.7                   | 13        |
| Adult hepatocellular carcinoma         | HuH-7     | 6.8                   | 13        |
| Adult hepatocellular carcinoma         | HLE       | 45.9                  | 13        |
| Adult hepatocellular carcinoma         | HLF       | 126.1                 | 13        |
| Adult hepatocellular carcinoma         | PLC/PRF/5 | 76.9                  | 13        |
| Hepatic epithelial neoplasm            | SK-Hep1   | 21.9                  | 13        |
| Pediatric hepatocellular carcinoma     | Hep-3B    | 7.6                   | 13        |
| Hepatoblastoma                         | Hep-G2    | 14.7                  | 13        |
| Gastric carcinoma                      | HGC-27    | 3.98                  | 14        |
| Gastric mucinous adenocarcinoma        | MGC-803   | 2.82                  | 14        |

GSK1070916 *in vitro* IC<sub>50</sub> values

| Malignancy                                    | Cell Line       | IC <sub>50</sub> (nM)  | Reference |
|-----------------------------------------------|-----------------|------------------------|-----------|
| Endocervical adenocarcinoma (HPV related)     | KB-3-1          | 16                     | 15        |
| Endocervical adenocarcinoma (HPV related)     | KB-C2           | 1359                   | 15        |
| Colon adenocarcinoma                          | SW620           | 96                     | 15        |
| Colon adenocarcinoma                          | SW620/AD300     | 1460                   | 15        |
| Embryonic kidney cells                        | HEK293/pcDNA3.1 | 435                    | 15        |
| Embryonic kidney cells                        | HEK293/ABCB1    | 3331                   | 15        |
| Human retinoblastoma                          | Y-79            | 17.89                  | 3         |
| Patient-derived retinoblastoma cells          | LRB1            | 5.97                   | 3         |
| Patient-derived retinoblastoma cells          | LRB2            | 5.88                   | 3         |
| Osteosarcoma                                  | U2OS            | 34 (EC <sub>50</sub> ) | 16        |
| B-cell chronic leukemia                       | MEC-1           | 10 (EC <sub>50</sub> ) | 16        |
| Primary cutaneous T-cell non-Hodgkin lymphoma | MJ              | 7 (EC <sub>50</sub> )  | 16        |
| Cutaneous T-cell lymphoma (Sézary syndrome)   | HuT 78          | 14 (EC <sub>50</sub> ) | 16        |
| Primary cutaneous T-cell non-Hodgkin lymphoma | HH              | 18 (EC <sub>50</sub> ) | 16        |
| Precursor T-cell acute lymphoblastic leukemia | ALL-SIL         | 2 (EC <sub>50</sub> )  | 16        |
| Precursor T-cell acute lymphoblastic leukemia | MOLT-16         | 3 (EC <sub>50</sub> )  | 16        |

| Malignancy                                    | Cell Line | IC <sub>50</sub> (nM)   | Reference |
|-----------------------------------------------|-----------|-------------------------|-----------|
| Precursor T-cell acute lymphoblastic leukemia | HSB-2     | 3 (EC <sub>50</sub> )   | 16        |
| Chronic myelogenous leukemia                  | CML-T1    | 3 (EC <sub>50</sub> )   | 16        |
| Precursor T-cell acute lymphoblastic leukemia | MOLT-4    | 3 (EC <sub>50</sub> )   | 16        |
| Precursor T-cell acute lymphoblastic leukemia | Jurkat    | 3 (EC <sub>50</sub> )   | 16        |
| Precursor T-cell acute lymphoblastic leukemia | CTV-1     | 4 (EC <sub>50</sub> )   | 16        |
| Precursor T-cell acute lymphoblastic leukemia | SKW-3     | 5 (EC <sub>50</sub> )   | 16        |
| Precursor T-cell acute lymphoblastic leukemia | MOLT-3    | 5 (EC <sub>50</sub> )   | 16        |
| Precursor T-cell acute lymphoblastic leukemia | CEM/C1    | 6 (EC <sub>50</sub> )   | 16        |
| Precursor T-cell acute lymphoblastic leukemia | CCRF-CEM  | 7 (EC <sub>50</sub> )   | 16        |
| Precursor T-cell acute lymphoblastic leukemia | JRT3-T3.5 | 9 (EC <sub>50</sub> )   | 16        |
| Precursor T-cell acute lymphoblastic leukemia | DND-41    | 787 (EC <sub>50</sub> ) | 16        |
| Chronic myeloid leukemia                      | EM-2      | 4 (EC <sub>50</sub> )   | 16        |
| Chronic myeloid leukemia                      | EM-3      | 4 (EC <sub>50</sub> )   | 16        |
| Chronic myeloid leukemia                      | BV173     | 5 (EC <sub>50</sub> )   | 16        |
| Chronic myeloid leukemia                      | KCL-22    | 5 (EC <sub>50</sub> )   | 16        |
| Chronic myeloid leukemia                      | KU812     | 8 (EC <sub>50</sub> )   | 16        |
| Blast phase chronic myelogenous leukemia      | K-562     | 13 (EC <sub>50</sub> )  | 16        |

| Malignancy                                    | Cell Line | IC <sub>50</sub> (nM)  | Reference |
|-----------------------------------------------|-----------|------------------------|-----------|
| Blast phase chronic myelogenous leukemia      | MEG-01    | 44 (EC <sub>50</sub> ) | 16        |
| Acute myeloid leukemia                        | PLB-985   | 1 (EC <sub>50</sub> )  | 16        |
| Acute monoblastic/monocytic leukemia          | NOMO-1    | 2 (EC <sub>50</sub> )  | 16        |
| Precursor T-cell acute lymphoblastic leukemia | CCRF-SB   | 2 (EC <sub>50</sub> )  | 16        |
| Acute myeloid leukemia                        | OCI-AML-2 | 4 (EC <sub>50</sub> )  | 16        |
| Acute myeloid leukemia                        | OCI-AML-3 | 4 (EC <sub>50</sub> )  | 16        |
| Acute myeloid leukemia                        | ML-2      | 5 (EC <sub>50</sub> )  | 16        |
| Acute monoblastic/monocytic leukemia          | THP-1     | 5 (EC <sub>50</sub> )  | 16        |
| Acute monoblastic/monocytic leukemia          | MV-4-11   | 7 (EC <sub>50</sub> )  | 16        |
| Acute myeloid leukemia                        | HL-60     | 10 EC <sub>50</sub> )  | 16        |
| Myelodysplastic syndrome                      | F-36P     | 10 (EC <sub>50</sub> ) | 16        |
| Acute promyelocytic leukemia                  | NB4       | 11 (EC <sub>50</sub> ) | 16        |
| Acute megakaryoblastic leukemia               | M-07e     | 13 (EC <sub>50</sub> ) | 16        |
| Acute myeloid leukemia                        | OCI-M1    | 20 (EC <sub>50</sub> ) | 16        |
| Acute myeloid leukemia                        | GDM-1     | 21 (EC <sub>50</sub> ) | 16        |
| Acute myeloid leukemia                        | BDCM      | 26 (EC <sub>50</sub> ) | 16        |
| Acute megakaryoblastic                        | CMK       | 27 (EC <sub>50</sub> ) | 16        |

| Malignancy                                    | Cell Line  | IC <sub>50</sub> (nM)    | Reference |
|-----------------------------------------------|------------|--------------------------|-----------|
| leukemia in Down syndrome                     |            |                          |           |
| Acute myeloid leukemia                        | KG-1       | 32 (EC <sub>50</sub> )   | 16        |
| Acute erythroid leukemia                      | HEL 92.1.7 | 60 (EC <sub>50</sub> )   | 16        |
| B-cell prolymphocytic leukemia                | JVM-3      | 2 (EC <sub>50</sub> )    | 16        |
| B-lymphoblastic leukemia/lymphoma             | SUP-B15    | 2 (EC <sub>50</sub> )    | 16        |
| Precursor B-cell acute lymphoblastic leukemia | NALM-6     | 2 (EC <sub>50</sub> )    | 16        |
| Diffuse large B-cell lymphoma                 | KARPAS-231 | 3 (EC <sub>50</sub> )    | 16        |
| B-lymphoblastic leukemia/lymphoma             | SEM        | 3 (EC <sub>50</sub> )    | 16        |
| B-lymphoblastic leukemia/lymphoma             | RCH-ACV    | 4 (EC <sub>50</sub> )    | 16        |
| Acute myeloid leukemia                        | CESS       | 5 (EC <sub>50</sub> )    | 16        |
| B-lymphoblastic leukemia/lymphoma             | Kasumi-2   | 6 (EC <sub>50</sub> )    | 16        |
| Precursor B-cell acute lymphoblastic leukemia | TANOUE     | 1478 (EC <sub>50</sub> ) | 16        |
| Acute myeloid leukemia                        | HD-MY-Z    | 4 (EC <sub>50</sub> )    | 16        |
| B-lymphoblastoid                              | Hs 445     | 5 (EC <sub>50</sub> )    | 16        |
| B-lymphoblastoid                              | RPMI 6666  | 10 (EC <sub>50</sub> )   | 16        |
| Hodgkin lymphoma                              | L-428      | 31 (EC <sub>50</sub> )   | 16        |
| Hodgkin lymphoma                              | TO 175.t   | 54 (EC <sub>50</sub> )   | 16        |
| Burkitt lymphoma                              | ST486      | 2 (EC <sub>50</sub> )    | 16        |

| Malignancy                   | Cell Line | IC <sub>50</sub> (nM)  | Reference |
|------------------------------|-----------|------------------------|-----------|
| EBV-related Burkitt lymphoma | EB2       | 2 (EC <sub>50</sub> )  | 16        |
| EBV-related Burkitt lymphoma | Raji      | 3 (EC <sub>50</sub> )  | 16        |
| Burkitt lymphoma             | GA10      | 4 (EC <sub>50</sub> )  | 16        |
| EBV-related Burkitt lymphoma | Daudi     | 5 (EC <sub>50</sub> )  | 16        |
| EBV-related Burkitt lymphoma | Jiyoye    | 5 (EC <sub>50</sub> )  | 16        |
| Burkitt lymphoma             | CA46      | 5 (EC <sub>50</sub> )  | 16        |
| EBV-related Burkitt lymphoma | Namalwa   | 6 (EC <sub>50</sub> )  | 16        |
| EBV-related Burkitt lymphoma | NC-37     | 7 (EC <sub>50</sub> )  | 16        |
| EBV-related Burkitt lymphoma | EB1       | 7 (EC <sub>50</sub> )  | 16        |
| EBV-related Burkitt lymphoma | EB3       | 7 (EC <sub>50</sub> )  | 16        |
| EBV-related Burkitt lymphoma | P3HR-1    | 8 (EC <sub>50</sub> )  | 16        |
| B-cell non-Hodgkin lymphoma  | MC116     | 8 (EC <sub>50</sub> )  | 16        |
| B-lymphoblastoid             | 1A2       | 9 (EC <sub>50</sub> )  | 16        |
| EBV-related Burkitt lymphoma | HS-Sultan | 14 (EC <sub>50</sub> ) | 16        |
| Burkitt lymphoma             | DG-75     | 18 (EC <sub>50</sub> ) | 16        |
| Primary effusion lymphoma    | CRO-AP2   | 3 (EC <sub>50</sub> )  | 16        |
| Primary effusion lymphoma    | CRO-AP5   | 3 (EC <sub>50</sub> )  | 16        |



| Malignancy                                                | Cell Line  | IC <sub>50</sub> (nM) | Reference |
|-----------------------------------------------------------|------------|-----------------------|-----------|
| ALK-positive anaplastic large cell lymphoma               | SR         | 3 (EC <sub>50</sub> ) | 16        |
| Diffuse large B-cell lymphoma activated B-cell type       | NU-DUL-1   | 4 (EC <sub>50</sub> ) | 16        |
| B-cell non-Hodgkin lymphoma                               | MHH-PREB-1 | 4 (EC <sub>50</sub> ) | 16        |
| Diffuse large B-cell lymphoma germinal centre B-cell type | OCI-LY-19  | 4 (EC <sub>50</sub> ) | 16        |
| B-cell non-Hodgkin lymphoma                               | SU-DHL-16  | 4 (EC <sub>50</sub> ) | 16        |
| Diffuse large B-cell lymphoma germinal centre B-cell type | Pfeiffer   | 4 (EC <sub>50</sub> ) | 16        |
| Acute monoblastic/monocytic leukemia                      | U-937      | 5 (EC <sub>50</sub> ) | 16        |
| Diffuse large B-cell lymphoma germinal centre B-cell type | SU-DHL-5   | 5 (EC <sub>50</sub> ) | 16        |
| Diffuse large B-cell lymphoma germinal centre B-cell type | SU-DHL-4   | 5 (EC <sub>50</sub> ) | 16        |
| Diffuse large B-cell lymphoma germinal centre B-cell type | SU-DHL-6   | 6 (EC <sub>50</sub> ) | 16        |
| Diffuse large B-cell lymphoma germinal centre B-cell type | HT         | 7 (EC <sub>50</sub> ) | 16        |
| Precursor B-cell acute lymphoblastic leukemia             | JM-1       | 7 (EC <sub>50</sub> ) | 16        |
| Diffuse large B-cell lymphoma germinal centre B-cell type | Farage     | 7 (EC <sub>50</sub> ) | 16        |

| Malignancy                                                | Cell Line | IC <sub>50</sub> (nM)  | Reference |
|-----------------------------------------------------------|-----------|------------------------|-----------|
| B-lymphoblastoid                                          | MC/CAR    | 9 (EC <sub>50</sub> )  | 16        |
| Diffuse large B-cell lymphoma                             | RL        | 10 (EC <sub>50</sub> ) | 16        |
| Diffuse large B-cell lymphoma germinal centre B-cell type | DB        | 11 (EC <sub>50</sub> ) | 16        |
| Follicular lymphoma                                       | Sc-1      | 12 (EC <sub>50</sub> ) | 16        |
| Diffuse large B-cell lymphoma germinal centre B-cell type | DoHH-2    | 14 (EC <sub>50</sub> ) | 16        |
| Diffuse large B-cell lymphoma germinal centre B-cell type | Toledo    | 15 (EC <sub>50</sub> ) | 16        |
| Diffuse large B-cell lymphoma germinal centre B-cell type | SU-DHL-10 | 15 (EC <sub>50</sub> ) | 16        |
| B-lymphoblastoid                                          | ARH-77    | 15 (EC <sub>50</sub> ) | 16        |
| Primary effusion lymphoma                                 | BC-1      | 18 (EC <sub>50</sub> ) | 16        |
| Primary effusion lymphoma                                 | BC-3      | 27 (EC <sub>50</sub> ) | 16        |
| Primary effusion lymphoma                                 | BCP-1     | 31 (EC <sub>50</sub> ) | 16        |
| Diffuse large B-cell lymphoma germinal center B-cell type | RC-K8     | 38 (EC <sub>50</sub> ) | 16        |
| Primary effusion lymphoma                                 | BC-2      | 75 (EC <sub>50</sub> ) | 16        |
| Mantle cell lymphoma                                      | REC-1     | 77 (EC <sub>50</sub> ) | 16        |
| B-lymphoblastoid                                          | HuNS1     | 9 (EC <sub>50</sub> )  | 16        |

| Malignancy                             | Cell Line | IC <sub>50</sub> (nM)   | Reference |
|----------------------------------------|-----------|-------------------------|-----------|
| Human myeloma                          | RPMI8266  | 11 (EC <sub>50</sub> )  | 16        |
| Multiple myeloma                       | SKO-007   | 353 (EC <sub>50</sub> ) | 16        |
| Multiple myeloma                       | U266B1    | 422(EC <sub>50</sub> )  | 16        |
| Minimally invasive lung adenocarcinoma | NCI-H358  | 4 (EC <sub>50</sub> )   | 16        |
| Lung adenocarcinoma                    | A-549     | 7 (EC <sub>50</sub> )   | 16        |
| Lung squamous cell carcinoma           | NCI-H157  | 8 (EC <sub>50</sub> )   | 16        |
| Colon adenocarcinoma                   | MV-522    | 13 (EC <sub>50</sub> )  | 16        |
| Lung large cell carcinoma              | NCI-H460  | 14 (EC <sub>50</sub> )  | 16        |
| Lung large cell carcinoma              | NCI-H1299 | 23 (EC <sub>50</sub> )  | 16        |
| Lung large cell carcinoma              | NCI-H1155 | 40 (EC <sub>50</sub> )  | 16        |
| Endometrial adenocarcinoma             | HEC-1-B   | 4 (EC <sub>50</sub> )   | 16        |
| Melanoma                               | SK-MEL-2  | 2 (EC <sub>50</sub> )   | 16        |
| Amelanotic melanoma                    | A375-P    | 7 (EC <sub>50</sub> )   | 16        |
| Cutaneous melanoma                     | SK-MEL-28 | 7 (EC <sub>50</sub> )   | 16        |
| Cutaneous melanoma                     | SK-MEL-5  | 8 (EC <sub>50</sub> )   | 16        |
| Vulvar squamous cell carcinoma         | SW954     | 11 (EC <sub>50</sub> )  | 16        |
| Prostate carcinoma                     | PC-3      | 11 (EC <sub>50</sub> )  | 16        |
| Prostate carcinoma                     | LNCaP     | 12 (EC <sub>50</sub> )  | 16        |

| Malignancy                                | Cell Line  | IC <sub>50</sub> (nM)  | Reference |
|-------------------------------------------|------------|------------------------|-----------|
| Prostate carcinoma                        | DU145      | 15 (EC <sub>50</sub> ) | 16        |
| Pancreatic ductal adenocarcinoma          | AsPC-1     | 2 (EC <sub>50</sub> )  | 16        |
| Pancreatic ductal adenocarcinoma          | Mia PaCa-2 | 3 (EC <sub>50</sub> )  | 16        |
| Pancreatic ductal adenocarcinoma          | BxPC-3     | 3 (EC <sub>50</sub> )  | 16        |
| Pancreatic ductal adenocarcinoma          | PANC-1     | 13 (EC <sub>50</sub> ) | 16        |
| High grade ovarian serous adenocarcinoma  | OVCAR-3    | 3 (EC <sub>50</sub> )  | 16        |
| Ovarian endometrioid adenocarcinoma       | A2780      | 5 (EC <sub>50</sub> )  | 16        |
| High grade ovarian serous adenocarcinoma  | OVCAR-4    | 11 (EC <sub>50</sub> ) | 16        |
| Ovarian serous cystadenocarcinoma         | SK-OV-3    | 12 (EC <sub>50</sub> ) | 16        |
| High grade ovarian serous adenocarcinoma  | OVCAR-8    | 30 (EC <sub>50</sub> ) | 16        |
| Pediatric hepatocellular carcinoma        | Hep-3B     | 12 (EC <sub>50</sub> ) | 16        |
| Renal cell carcinoma                      | A-498      | 33 (EC <sub>50</sub> ) | 16        |
| Renal cell carcinoma                      | 786-O      | 57 (EC <sub>50</sub> ) | 16        |
| Tongue squamous cell carcinoma            | HN-5       | 10 (EC <sub>50</sub> ) | 16        |
| Endocervical adenocarcinoma (HPV-related) | HeLa       | 13 (EC <sub>50</sub> ) | 16        |
| Breast adenocarcinoma                     | SK-BR-3    | 4 (EC <sub>50</sub> )  | 16        |
| Breast adenocarcinoma                     | MDA-MB-453 | 6 (EC <sub>50</sub> )  | 16        |

| Malignancy                                   | Cell Line  | IC <sub>50</sub> (nM)  | Reference |
|----------------------------------------------|------------|------------------------|-----------|
| Breast carcinoma                             | MX-1       | 8 (EC <sub>50</sub> )  | 16        |
| Breast adenocarcinoma                        | MDA-MB-231 | 11 (EC <sub>50</sub> ) | 16        |
| Breast adenocarcinoma                        | MDA-MB-468 | 12 (EC <sub>50</sub> ) | 16        |
| Invasive breast carcinoma of no special type | MCF-7      | 13 (EC <sub>50</sub> ) | 16        |
| Invasive breast carcinoma of no special type | T-47D      | 13 (EC <sub>50</sub> ) | 16        |
| Colon adenocarcinoma                         | SW48       | 2 (EC <sub>50</sub> )  | 16        |
| Colon adenocarcinoma                         | COLO 201   | 2 (EC <sub>50</sub> )  | 16        |
| Colon adenocarcinoma                         | SW480      | 3 (EC <sub>50</sub> )  | 16        |
| Colon adenocarcinoma                         | WiDr       | 3 (EC <sub>50</sub> )  | 16        |
| Colon adenocarcinoma                         | COLO 205   | 7 (EC <sub>50</sub> )  | 16        |
| Colon carcinoma                              | RKO-E6     | 7 (EC <sub>50</sub> )  | 16        |
| Colon carcinoma                              | RKO        | 7 (EC <sub>50</sub> )  | 16        |
| Colon adenocarcinoma                         | LOVO       | 7 (EC <sub>50</sub> )  | 16        |
| Colon carcinoma                              | HCT116     | 8 (EC <sub>50</sub> )  | 16        |
| Colon adenocarcinoma                         | SW620      | 8 (EC <sub>50</sub> )  | 16        |
| Colon adenocarcinoma                         | HT29       | 10 (EC <sub>50</sub> ) | 16        |
| Colon adenocarcinoma                         | SW1417     | 19 (EC <sub>50</sub> ) | 16        |
| Colon adenocarcinoma                         | DLD-1      | 28 (EC <sub>50</sub> ) | 16        |

| Malignancy           | Cell Line   | IC <sub>50</sub> (nM)   | Reference |
|----------------------|-------------|-------------------------|-----------|
| Colon adenocarcinoma | HCT 8       | 38 (EC <sub>50</sub> )  | 16        |
| Colon adenocarcinoma | COLO 320HSR | 92 (EC <sub>50</sub> )  | 16        |
| Colon adenocarcinoma | COLO 320DM  | 96 (EC <sub>50</sub> )  | 16        |
| Rectal carcinoma     | NCI-H630    | 127 (EC <sub>50</sub> ) | 16        |

PHA-739358 *in vitro* IC<sub>50</sub> values

| Malignancy                                   | Cell Line  | IC <sub>50</sub> (nM) | Reference |
|----------------------------------------------|------------|-----------------------|-----------|
| Adult hepatocellular carcinoma               | HuH-7      | 15                    | 17        |
| Hepatoblastoma                               | HepG2      | 20                    | 17        |
| Invasive breast carcinoma of no special type | T-47D      | 210                   | 18        |
| Acral lentiginous melanoma                   | WM3211     | 1760                  | 19        |
| Melanoma                                     | 1205Lu     | 3340                  | 19        |
| Cutaneous melanoma                           | SK-MEL-28  | 12450                 | 19        |
| Acute monoblastic/monocytic leukemia         | THP-1      | 2690                  | 20        |
| Acute myeloid leukemia                       | HL-60      | 3250                  | 20        |
| Chronic myeloid leukemia                     | K-562      | 3020                  | 20        |
| Breast adenocarcinoma                        | MDA-MB-231 | 3090                  | 21        |
| Invasive breast carcinoma of no special type | MCF7       | 5140                  | 21        |

| Malignancy                                     | Cell Line | IC <sub>50</sub> (nM) | Reference |
|------------------------------------------------|-----------|-----------------------|-----------|
| Cervical squamous cell carcinoma (HPV-related) | C13       | 1830                  | 22        |
| Acute myeloid leukemia                         | HL-60     | 3000                  | 23        |
| Chronic myeloid leukemia                       | K-562     | 200                   | 23        |
| Pediatric hepatocellular carcinoma             | Hep3B     | 22030                 | 24        |
| Gastric tubular adenocarcinoma                 | NCI-N87   | 2770                  | 25        |
| Gastric adenocarcinoma                         | AGS       | 1450                  | 25        |
| Amelanotic melanoma                            | A375      | 254                   | 26        |
| Cutaneous melanoma                             | SK-MEL-5  | 1718                  | 26        |

AT9283 *in vitro* IC<sub>50</sub> values

| Malignancy                               | Cell Line  | IC <sub>50</sub> (nM) | Reference |
|------------------------------------------|------------|-----------------------|-----------|
| Chronic myeloid leukemia                 | BV-173     | 55                    | 27        |
| Chronic myeloid leukemia                 | Ku812      | 26                    | 27        |
| Chronic myeloid leukemia                 | MYL        | 21                    | 27        |
| Chronic myeloid leukemia                 | KT-1       | 81                    | 27        |
| Chronic myeloid leukemia                 | KBM-5      | 84                    | 27        |
| Blast phase chronic myelogenous leukemia | MEG-01     | 31                    | 27        |
| Blast phase chronic myelogenous leukemia | K-562      | 100 (polyploidy)      | 27        |
| Chronic myeloid leukemia                 | KBM-5/STIR | 16                    | 27        |

| Malignancy                                                | Cell Line    | IC <sub>50</sub> (nM) | Reference |
|-----------------------------------------------------------|--------------|-----------------------|-----------|
| Chronic myeloid leukemia                                  | BV-173/shBim | 12                    | 27        |
| Acute myeloid leukemia                                    | HL-60        | 30 (polyploidy)       | 27        |
| Precursor T-cell acute lymphoblastic leukemia             | Jurkat       | 500 (polyploidy)      | 27        |
| Precursor T-cell acute lymphoblastic leukemia             | NALM-6       | 140 (polyploidy)      | 27        |
| Acute myeloid leukemia                                    | KG-1a        | 55 (polyploidy)       | 27        |
| EBV-related Burkitt lymphoma                              | Raji         | 370                   | 28        |
| Diffuse large B-cell lymphoma germinal centre B-cell type | Toledo       | 110                   | 28        |
| Mantle cell lymphoma                                      | Granta-519   | 850                   | 28        |
| Diffuse large B-cell lymphoma germinal centre B-cell type | SU-DHL-4     | 280                   | 28        |

AMG 900 *in vitro* IC<sub>50</sub> values

| Malignancy                      | Cell Line  | IC <sub>50</sub> (nM)   | Reference |
|---------------------------------|------------|-------------------------|-----------|
| Liposarcoma                     | SW872      | 3.7 (EC <sub>50</sub> ) | 8         |
| Well-differentiated liposarcoma | 93T449     | 6.5 (EC <sub>50</sub> ) | 8         |
| Colon carcinoma                 | HCT116     | 1.4 (EC <sub>50</sub> ) | 8         |
| Breast ductal carcinoma         | HCC1187    | 0.08                    | 29        |
| Breast adenocarcinoma           | MDA-MB-468 | 0.07                    | 29        |
| Breast ductal carcinoma         | HCC38      | 0.04                    | 29        |



| Malignancy                                   | Cell Line  | IC <sub>50</sub> (nM) | Reference |
|----------------------------------------------|------------|-----------------------|-----------|
| Breast ductal carcinoma                      | HCC70      | 0.08                  | 29        |
| Breast ductal carcinoma                      | EFM-19     | 0.39                  | 29        |
| Invasive breast carcinoma of no special type | BT-20      | 0.46                  | 29        |
| Breast ductal carcinoma                      | HCC1395    | 0.5                   | 29        |
| Breast carcinoma                             | MDA-MB-157 | 0.45                  | 29        |
| Breast ductal carcinoma                      | HCC1569    | 0.1                   | 29        |
| Invasive breast lobular carcinoma            | MDA-MB-134 | 0.3                   | 29        |
| Invasive breast carcinoma of no special type | UACC-893   | 2.12                  | 29        |
| Breast adenocarcinoma                        | MDA-MB-361 | 1.19                  | 29        |
| Breast adenocarcinoma                        | CAMA-1     | 0.38                  | 29        |
| Invasive breast carcinoma of no special type | BT-549     | 0.07                  | 29        |
| Invasive breast carcinoma of no special type | ZR-75-1    | 0.07                  | 29        |
| Invasive breast carcinoma of no special type | SUM225CWN  | 2.78                  | 29        |
| Breast carcinoma                             | UACC-732   | 0.7                   | 29        |
| Breast adenocarcinoma                        | MDA-MB-415 | 2.23                  | 29        |
| Breast adenocarcinoma                        | SK-BR-3    | 0.12                  | 29        |
| Invasive breast carcinoma of no special type | BT-474     | 0.11                  | 29        |
| Breast ductal carcinoma                      | HCC1954    | 0.13                  | 29        |

| Malignancy                                           | Cell Line      | IC <sub>50</sub> (nM) | Reference |
|------------------------------------------------------|----------------|-----------------------|-----------|
| Amelanotic melanoma                                  | MDA-MB-435     | 0.04                  | 29        |
| Breast ductal carcinoma                              | HCC1419        | 0.08                  | 29        |
| Invasive breast carcinoma of no special type         | MDA-MB-436     | 1.64                  | 29        |
| Invasive breast carcinoma of no special type         | Hs 578T        | 0.92                  | 29        |
| Breast carcinoma                                     | CAL-51         | 1.17                  | 29        |
| Invasive breast carcinoma of no special type         | MDA-MB-175-VII | 0.19                  | 29        |
| Breast inflammatory carcinoma                        | SUM190PT       | 0.27                  | 29        |
| Breast squamous cell carcinoma, acantholytic variant | HCC1806        | 0.02                  | 29        |
| Breast carcinoma                                     | EFM-192A       | 0.09                  | 29        |
| Non-malignant breast epithelial cells                | 184A1          | 1.18                  | 29        |
| Non-malignant breast epithelial cells                | 184B5          | 1.03                  | 29        |
| Breast carcinoma                                     | COLO 824       | 0.49                  | 29        |
| Breast carcinoma                                     | DU4475         | 1.15                  | 29        |
| Breast ductal carcinoma                              | HCC1143        | 0.03                  | 29        |
| Breast ductal carcinoma                              | HCC1937        | 0.06                  | 29        |
| Breast ductal carcinoma                              | HCC2218        | 2.05                  | 29        |
| Invasive breast carcinoma of no special type         | KPL-1          | 0.88                  | 29        |

| Malignancy                                   | Cell Line                           | IC <sub>50</sub> (nM) | Reference |
|----------------------------------------------|-------------------------------------|-----------------------|-----------|
| Non-malignant breast epithelial cells        | MCF-10A                             | 0.92                  | 29        |
| Invasive breast carcinoma of no special type | MCF-7                               | 0.22                  | 29        |
| Breast adenocarcinoma                        | MDA-MB-231                          | 0.25                  | 29        |
| Breast adenocarcinoma                        | MDA-MB-453                          | 0.02                  | 29        |
| Invasive breast carcinoma of no special type | T-47D                               | 0.46                  | 29        |
| Invasive breast carcinoma of no special type | UACC-812                            | 15.21                 | 29        |
| Lung large cell carcinoma                    | NCI-H460 parental                   | 3                     | 30        |
| Lung large cell carcinoma                    | NCI-H460-PTX paclitaxel resistant   | 3                     | 30        |
| Breast adenocarcinoma                        | MDA-MB-231 parental                 | 2                     | 30        |
| Breast adenocarcinoma                        | MDA-MB-231-PTX paclitaxel resistant | 3                     | 30        |
| Uterine corpus sarcoma                       | MES-SA parental                     | 3                     | 30        |
| Uterine corpus sarcoma                       | MES-SA-Dx5 doxorubicin resistant    | 2                     | 30        |
| Plasma cell myeloma                          | U226-B1                             | 2 (EC <sub>50</sub> ) | 30        |
| Plasma cell myeloma                          | RPMI-8226                           | 3 (EC <sub>50</sub> ) | 30        |

ZM447439 *in vitro* IC<sub>50</sub> values

| Malignancy     | Cell Line | IC <sub>50</sub> (nM) | Reference |
|----------------|-----------|-----------------------|-----------|
| Retinoblastoma | Y-79      | 845.27                | 3         |

| Malignancy                                   | Cell Line     | IC <sub>50</sub> (nM) | Reference |
|----------------------------------------------|---------------|-----------------------|-----------|
| Patient-derived retinoblastoma cells         | LRB1          | 641.47                | 3         |
| Patient-derived retinoblastoma cells         | LRB2          | 680.27                | 3         |
| Lung adenocarcinoma                          | A549          | 3300                  | 31        |
| Lung large cell carcinoma                    | NCI-H1299     | 700                   | 31        |
| Invasive breast carcinoma of no special type | MCF-7         | 800                   | 31        |
| Hepatoblastoma                               | HepG2         | 600                   | 31        |
| Adult hepatocellular carcinoma               | HLF           | 10 000                | 31        |
| Canine leukemia                              | GL-1          | 4770                  | 32        |
| Canine lymphoma                              | EMA           | 8030                  | 32        |
| Osteosarcoma                                 | U2OS          | 400                   | 33        |
| Osteosarcoma                                 | SaOS-2        | 400                   | 33        |
| Osteosarcoma                                 | IOR/OS18      | 2200                  | 33        |
| Osteosarcoma                                 | IOR/OS9       | 200                   | 33        |
| Osteosarcoma                                 | U2-OS/DX580   | 52 800                | 33        |
| Osteosarcoma                                 | Saos-2/DX580  | 16 300                | 33        |
| Osteosarcoma                                 | U2-OS/MTX300  | 600                   | 33        |
| Osteosarcoma                                 | Saos-2/MTX300 | 300                   | 33        |
| Osteosarcoma                                 | U2-OS/CDDP4   | 15 200                | 33        |

| Malignancy                                               | Cell Line        | IC <sub>50</sub> (nM) | Reference |
|----------------------------------------------------------|------------------|-----------------------|-----------|
| Osteosarcoma                                             | Saos-2/CDDP6     | 8400                  | 33        |
| Pancreatic ductal adenocarcinoma                         | Capan-1          | 1900                  | 34        |
| Normal human breast epithelial cell                      | MCF10A           | 2500                  | 34        |
| Normal human mammary epithelial cells (BRCA mutated)     | BRCA2-999del5-N2 | 2700                  | 34        |
| Normal human mammary epithelial cells (BRCA mutated)     | BRCA2-999del5-N1 | 2900                  | 34        |
| Normal human mammary epithelial cells (BRCA mutated)     | BRCA2-999del5-T2 | 3900                  | 34        |
| Normal breast epithelial progenitor cell line            | D492             | 3700                  | 34        |
| Normal breast epithelial cells (no mutations)            | 1585KT           | 4700                  | 34        |
| Invasive breast carcinoma of no special type             | MCF7             | 4700                  | 34        |
| Normal breast epithelial cells (6474del4 BRCA2 mutation) | 348T             | 5000                  | 34        |
| Invasive breast carcinoma of no special type             | T-47D            | 5400                  | 34        |
| Normal breast epithelial cells (4700del4 BRCA2 mutation) | 2981T            | 5600                  | 34        |
| Normal breast epithelial cells (no mutations)            | 1585T            | 6200                  | 34        |
| Normal breast epithelial cells (6474del4 BRCA2 mutation) | 348KT            | 6700                  | 34        |
| Normal breast epithelial                                 | 2980T            | 7400                  | 34        |

| Malignancy                                    | Cell Line | IC <sub>50</sub> (nM) | Reference |
|-----------------------------------------------|-----------|-----------------------|-----------|
| cells (4700del4 BRCA2 mutation)               |           |                       |           |
| Normal breast epithelial cells (no mutations) | 3736T     | 8100                  | 34        |

CYC116 *in vitro* IC<sub>50</sub> values

| Malignancy                                    | Cell Line | IC <sub>50</sub> (nM) | Reference |
|-----------------------------------------------|-----------|-----------------------|-----------|
| Lung adenocarcinoma                           | A549      | 480                   | 35        |
| Invasive breast carcinoma of no special type  | MCF7      | 599                   | 35        |
| Endocervical adenocarcinoma (HPV-related)     | HeLa      | 590                   | 35        |
| Colon adenocarcinoma                          | COLO205   | 241                   | 35        |
| Colon carcinoma                               | HCT116    | 340                   | 35        |
| Colon adenocarcinoma                          | HT29      | 725                   | 35        |
| Blast phase chronic myelogenous leukemia      | K-562     | 1375                  | 35        |
| Precursor T-cell acute lymphoblastic leukemia | CCRF-CEM  | 471                   | 35        |
| Biphenotypic leukemia                         | MV4-11    | 34                    | 35        |
| Acute myeloid leukemia                        | HL-60     | 372                   | 35        |
| Lung large cell carcinoma                     | NCI-H460  | 681                   | 35        |
| Ovarian endometrioid adenocarcinoma           | A2780     | 151                   | 35        |
| Pancreatic ductal adenocarcinoma              | BxPC-3    | 1626                  | 35        |

| Malignancy                       | Cell Line  | IC <sub>50</sub> (nM) | Reference |
|----------------------------------|------------|-----------------------|-----------|
| Pancreatic adenocarcinoma        | HuP-T4     | 775                   | 35        |
| Pancreatic ductal adenocarcinoma | MIA PaCa-2 | 308                   | 35        |
| Osteosarcoma                     | Saos-2     | 110                   | 35        |
| Uterine corpus sarcoma           | MES-SA     | 90                    | 35        |
|                                  |            |                       |           |

VX-680 *in vitro* IC<sub>50</sub> values

| Malignancy                                | Cell Line     | IC <sub>50</sub> (nM) | Reference |
|-------------------------------------------|---------------|-----------------------|-----------|
| Osteosarcoma                              | U2OS          | 2700                  | 33        |
| Osteosarcoma                              | Saos-2        | 2700                  | 33        |
| Osteosarcoma                              | IOR/OS18      | 5500                  | 33        |
| Osteosarcoma                              | IOR/OS9       | 700                   | 33        |
| Osteosarcoma                              | U2-OS/DX580   | 11 200                | 33        |
| Osteosarcoma                              | Saos-2/DX580  | 13 800                | 33        |
| Osteosarcoma                              | U2-OS/MTX300  | 4300                  | 33        |
| Osteosarcoma                              | Saos-2/MTX300 | 600                   | 33        |
| Osteosarcoma                              | U2-OS/CDDP4   | 4400                  | 33        |
| Osteosarcoma                              | Saos-2/CDDP6  | 2700                  | 33        |
| Endocervical adenocarcinoma (HPV-related) | HeLa          | 170                   | 36        |

SNS-314 *in vitro* IC<sub>50</sub> values

| Malignancy                                | Cell Line  | IC <sub>50</sub> (nM) | Reference |
|-------------------------------------------|------------|-----------------------|-----------|
| Colon carcinoma                           | HCT116     | 6.4                   | 37        |
| Colon adenocarcinoma                      | HT29       | 24.0                  | 37        |
| Lung adenocarcinoma (non-small cell)      | Calu-6     | 13.0                  | 37        |
| Lung large cell carcinoma                 | NCI-H1299  | 4.0                   | 37        |
| Prostate carcinoma                        | PC-3       | 4.4                   | 37        |
| Ovarian endometrioid adenocarcinoma       | A2780      | 1.8                   | 37        |
| Breast adenocarcinoma                     | MDA-MB-231 | 8.1                   | 37        |
| Endocervical adenocarcinoma (HPV-related) | HeLa       | 9.3                   | 37        |
| Pancreatic ductal adenocarcinoma          | MIA PaCa   | 9.1                   | 37        |
| Amelanotic melanoma                       | A375       | 5.9                   | 37        |

BI 847325 *in vitro* IC<sub>50</sub> values

| Malignancy                                             | Cell Line | IC <sub>50</sub> (nM)   | Reference |
|--------------------------------------------------------|-----------|-------------------------|-----------|
| Amelanotic melanoma                                    | A375      | 7.5 (GI <sub>50</sub> ) | 38        |
| Lung adenocarcinoma (non-small cell)                   | Calu-6    | 60 (GI <sub>50</sub> )  | 38        |
| Melanoma                                               | M229      | 0.7                     | 39        |
| Melanoma (increased PDGFR $\beta$ expression mutation) | M229R     | 4                       | 39        |



| Malignancy                               | Cell Line | IC <sub>50</sub> (nM) | Reference |
|------------------------------------------|-----------|-----------------------|-----------|
| Amelanotic melanoma                      | A-375     | 0.3                   | 39        |
| Melanoma (Ras mutation)                  | A-375R    | 0.5                   | 39        |
| Melanoma                                 | WM793     | 2000                  | 39        |
| Melanoma (resistance mutation)           | WM793R    | 230                   | 39        |
| Melanoma                                 | 1205Lu    | 140                   | 39        |
| Melanoma (resistance mutation)           | 1205LuR   | 320                   | 39        |
| Melanoma                                 | M249      | 0.3                   | 39        |
| Melanoma (Ras mutation)                  | M249R     | 1                     | 39        |
| Cutaneous melanoma                       | WM164     | 5                     | 39        |
| Cutaneous melanoma (resistance mutation) | WM164R    | 80                    | 39        |
| Melanoma                                 | WM39      | 0.6                   | 39        |
| Melanoma                                 | RPMI17951 | 0.6                   | 39        |

GSK650394 *in vitro* IC<sub>50</sub> values

| Malignancy                                   | Cell Line | IC <sub>50</sub> (nM) | Reference |
|----------------------------------------------|-----------|-----------------------|-----------|
| Hepatoblastoma                               | HepG2     | 1530                  | 40        |
| Endocervical adenocarcinoma (HPV-related)    | L-02      | 1750                  | 40        |
| Invasive breast carcinoma of no special type | MCF-7     | 1420                  | 40        |

| Malignancy                                | Cell Line | IC <sub>50</sub> (nM) | Reference |
|-------------------------------------------|-----------|-----------------------|-----------|
| Normal human embryonic fibroblast cells   | HELFL     | 6140                  | 40        |
| Endocervical adenocarcinoma (HPV-related) | HeLa      | 3570                  | 40        |

SP-96 *in vitro* IC<sub>50</sub> values

| Malignancy                                    | Cell Line  | IC <sub>50</sub> (nM)      | Reference |
|-----------------------------------------------|------------|----------------------------|-----------|
| Precursor T-cell acute lymphoblastic leukemia | CCRF-CEM   | 47.4 (GI <sub>50</sub> )   | 41        |
| Acute myeloid leukemia                        | HL-60(TB)  | 5900 (GI <sub>50</sub> )   | 41        |
| Blast phase chronic myelogenous leukemia      | K-562      | 2140 (GI <sub>50</sub> )   | 41        |
| Precursor T-cell acute lymphoblastic leukemia | MOLT-4     | 1950 (GI <sub>50</sub> )   | 41        |
| Human myeloma                                 | RPMI8226   | 1540 (GI <sub>50</sub> )   | 41        |
| ALK-positive anaplastic large cell lymphoma   | SR         | 1240 (GI <sub>50</sub> )   | 41        |
| Lung adenocarcinoma                           | A-549/ATCC | 1850 (GI <sub>50</sub> )   | 41        |
| Lung adenocarcinoma                           | EKVX       | 6220 (GI <sub>50</sub> )   | 41        |
| Lung adenocarcinoma                           | HOP-62     | 1840 (GI <sub>50</sub> )   | 41        |
| Lung non-small cell carcinoma                 | HOP-92     | 2230 (GI <sub>50</sub> )   | 41        |
| Pleural epithelioid mesothelioma              | NCI-H226   | 12 100 (GI <sub>50</sub> ) | 41        |
| Lung adenocarcinoma                           | NCI-H23    | 2990 (GI <sub>50</sub> )   | 41        |
| Minimally invasive lung adenocarcinoma        | NCI-H322M  | 3030 (GI <sub>50</sub> )   | 41        |

| Malignancy                | Cell Line  | IC <sub>50</sub> (nM)    | Reference |
|---------------------------|------------|--------------------------|-----------|
| Lung large cell carcinoma | NCI-H460   | 985 (GI <sub>50</sub> )  | 41        |
| Lung adenocarcinoma       | NCI-H522   | 1220 (GI <sub>50</sub> ) | 41        |
| Colon adenocarcinoma      | COLO205    | 50.3 (GI <sub>50</sub> ) | 41        |
| Colon adenocarcinoma      | HCC2998    | 4810 (GI <sub>50</sub> ) | 41        |
| Colon carcinoma           | HCT116     | 2040 (GI <sub>50</sub> ) | 41        |
| Colon carcinoma           | HCT 15     | 2500 (GI <sub>50</sub> ) | 41        |
| Colon adenocarcinoma      | HT29       | 1970 (GI <sub>50</sub> ) | 41        |
| Colon carcinoma           | KM12       | 2520 (GI <sub>50</sub> ) | 41        |
| Colon adenocarcinoma      | SW620      | 1900 (GI <sub>50</sub> ) | 41        |
| Astrocytoma               | SF268      | 1640 (GI <sub>50</sub> ) | 41        |
| Glioblastoma              | SF295      | 1810 (GI <sub>50</sub> ) | 41        |
| Gliosarcoma               | SF539      | 55.4 (GI <sub>50</sub> ) | 41        |
| Astrocytoma               | SNB-19     | 3160 (GI <sub>50</sub> ) | 41        |
| Glioblastoma              | SNB-75     | 39.1 (GI <sub>50</sub> ) | 41        |
| Astrocytoma               | U-251      | 1790 (GI <sub>50</sub> ) | 41        |
| Amelanotic melanoma       | LOX-IMVI   | 1550 (GI <sub>50</sub> ) | 41        |
| Melanoma                  | Malme-3M   | 1290 (GI <sub>50</sub> ) | 41        |
| Amelanotic melanoma       | M14        | 2610 (GI <sub>50</sub> ) | 41        |
| Amelanotic melanoma       | MDA-MB-435 | 1490 (GI <sub>50</sub> ) | 41        |

| Malignancy                               | Cell Line   | IC <sub>50</sub> (nM)      | Reference |
|------------------------------------------|-------------|----------------------------|-----------|
| Melanoma                                 | SK-MEL-2    | 4430 (GI <sub>50</sub> )   | 41        |
| Cutaneous melanoma                       | SK-MEL-28   | 1550 (GI <sub>50</sub> )   | 41        |
| Cutaneous melanoma                       | SK-MEL-5    | 1530 (GI <sub>50</sub> )   | 41        |
| Melanoma                                 | UACC-257    | 4500 (GI <sub>50</sub> )   | 41        |
| Melanoma                                 | UACC-62     | 3210 (GI <sub>50</sub> )   | 41        |
| Ovarian endometrioid adenocarcinoma      | IGROV-1     | 1300 (GI <sub>50</sub> )   | 41        |
| High grade ovarian serous adenocarcinoma | OVCAR-3     | 1510 (GI <sub>50</sub> )   | 41        |
| High grade ovarian serous adenocarcinoma | OVCAR-4     | 1850 (GI <sub>50</sub> )   | 41        |
| High grade ovarian serous adenocarcinoma | OVCAR-5     | 10 300 (GI <sub>50</sub> ) | 41        |
| High grade ovarian serous adenocarcinoma | OVCAR-8     | 2250 (GI <sub>50</sub> )   | 41        |
| High grade ovarian serous adenocarcinoma | NCI/ADR-RES | 10 800 (GI <sub>50</sub> ) | 41        |
| Ovarian serous cystadenocarcinoma        | SK-OV-3     | 610 (GI <sub>50</sub> )    | 41        |
| Renal cell carcinoma                     | 786-O       | 1870 (GI <sub>50</sub> )   | 41        |
| Renal cell carcinoma                     | A-498       | 53.2 (GI <sub>50</sub> )   | 41        |
| Papillary renal cell carcinoma           | ACHN        | 2170 (GI <sub>50</sub> )   | 41        |
| Clear cell renal cell carcinoma          | Caki-1      | 560 (GI <sub>50</sub> )    | 41        |
| Renal cell carcinoma                     | RXF 393L    | 1200 (GI <sub>50</sub> )   | 41        |
| Renal cell carcinoma                     | SN12C       | 1600 (GI <sub>50</sub> )   | 41        |

| Malignancy                                    | Cell Line       | IC <sub>50</sub> (nM)    | Reference |
|-----------------------------------------------|-----------------|--------------------------|-----------|
| Clear cell renal cell carcinoma               | TK-10           | 2720 (GI <sub>50</sub> ) | 41        |
| Renal cell carcinoma                          | UO-31           | 2090 (GI <sub>50</sub> ) | 41        |
| Prostate carcinoma                            | PC-3            | 2780 (GI <sub>50</sub> ) | 41        |
| Prostate carcinoma                            | DU145           | 1860 (GI <sub>50</sub> ) | 41        |
| Invasive breast carcinoma of no specific type | MCF7            | 1140 (GI <sub>50</sub> ) | 41        |
| Invasive breast carcinoma of no specific type | MCF7            | 517                      | 41        |
| Breast adenocarcinoma                         | MDA-MB-231/ATCC | 2880 (GI <sub>50</sub> ) | 41        |
| Invasive breast carcinoma of no specific type | Hs 578T         | 1500 (GI <sub>50</sub> ) | 41        |
| Invasive breast carcinoma of no specific type | BT-549          | 4040 (GI <sub>50</sub> ) | 41        |
| Invasive breast carcinoma of no specific type | T-47D           | 1620 (GI <sub>50</sub> ) | 41        |
| Breast adenocarcinoma                         | MDA-MB-468      | 107 (GI <sub>50</sub> )  | 41        |

PHA680632 *in vitro* IC<sub>50</sub> values

| Malignancy                                | Cell Line | IC <sub>50</sub> (nM) | Reference |
|-------------------------------------------|-----------|-----------------------|-----------|
| Cervical squamous cell carcinoma          | C-33 A    | 320                   | 42        |
| Endocervical adenocarcinoma (HPV-related) | HeLa      | 410                   | 42        |
| Colon carcinoma                           | HCT116    | 60                    | 42        |
| Colon adenocarcinoma                      | HT29      | 1170                  | 42        |

| Malignancy                                   | Cell Line | IC <sub>50</sub> (nM) | Reference |
|----------------------------------------------|-----------|-----------------------|-----------|
| Colon adenocarcinoma                         | LOVO      | 560                   | 42        |
| Lung adenocarcinoma                          | A549      | 620                   | 42        |
| Invasive breast carcinoma of no special type | MCF7      | 290                   | 42        |
| Ovarian endometrioid adenocarcinoma          | A2780     | 110                   | 42        |
| Osteosarcoma                                 | U2OS      | 1560                  | 42        |
| Prostate carcinoma                           | DU145     | 620                   | 42        |
| Acute monoblastic/monocytic leukemia         | U-937     | 70                    | 42        |
| Acute myeloid leukemia                       | HL-60     | 130                   | 42        |
| Normal human dermal fibroblast tissue        | NHDF      | 410                   | 42        |

CCT129202 *in vitro* IC<sub>50</sub> values

| Malignancy                                | Cell Line | IC <sub>50</sub> (nM)    | Reference |
|-------------------------------------------|-----------|--------------------------|-----------|
| Colon adenocarcinoma                      | COLO205   | 460 (GI <sub>50</sub> )  | 43        |
| Colon adenocarcinoma                      | SW620     | 700 (GI <sub>50</sub> )  | 43        |
| Colon carcinoma                           | HCT116    | 350 (GI <sub>50</sub> )  | 43        |
| Colon adenocarcinoma                      | HT29      | 500 (GI <sub>50</sub> )  | 43        |
| Colon carcinoma                           | KM12      | 1200 (GI <sub>50</sub> ) | 43        |
| Endocervical adenocarcinoma (HPV-related) | HeLa      | 200 (GI <sub>50</sub> )  | 43        |

| Malignancy                                   | Cell Line  | IC <sub>50</sub> (nM)    | Reference |
|----------------------------------------------|------------|--------------------------|-----------|
| Ovarian endometrioid adenocarcinoma          | A2780      | 300 (GI <sub>50</sub> )  | 43        |
| Ovarian endometrioid adenocarcinoma          | OVCAR8     | 1000 (GI <sub>50</sub> ) | 43        |
| Ovarian endometrioid adenocarcinoma          | MDA-MB-157 | 1700 (GI <sub>50</sub> ) | 43        |
| Biphenotypic leukemia                        | MV4-11     | 80 (GI <sub>50</sub> )   | 43        |
| Epidermal carcinoma of the mouth             | KB         | 1724                     | 44        |
| Endocervical adenocarcinoma (HPV-related)    | KBv200     | 7023                     | 44        |
| Colon adenocarcinoma                         | S1         | 987                      | 44        |
| Colon adenocarcinoma                         | S1-M1-80   | 6130                     | 44        |
| Invasive breast carcinoma of no special type | MCF-7      | 3647                     | 44        |
| High grade ovarian serous adenocarcinoma     | MCF-7/adr  | 25 660                   | 44        |
| Acute myeloid leukemia                       | HL-60      | 1464                     | 44        |
| Acute myeloid leukemia                       | HL-60/adr  | 6528                     | 44        |

Reversine *in vitro* IC<sub>50</sub> values

| Malignancy                                     | Cell Line  | IC <sub>50</sub> (nM) | Reference |
|------------------------------------------------|------------|-----------------------|-----------|
| Malignant neoplasms of the mouse mammary gland | 4T1        | 130                   | 45        |
| Breast adenocarcinoma                          | MDA-MB-231 | 190                   | 45        |
| Invasive breast carcinoma of no special type   | MCF-7      | 220                   | 45        |

| Malignancy                | Cell Line | IC <sub>50</sub> (nM) | Reference |
|---------------------------|-----------|-----------------------|-----------|
| Lung adenocarcinoma       | A549      | 4000                  | 46        |
| Lung large cell carcinoma | NCI-H1299 | 20 000                | 46        |
| Lung adenocarcinoma       | NCI-H1435 | 900                   | 46        |
| Lung adenocarcinoma       | NCI-H23   | 9700                  | 46        |

CCT137690 *in vitro* IC<sub>50</sub> values

| Malignancy                          | Cell Line | IC <sub>50</sub> (nM)   | Reference |
|-------------------------------------|-----------|-------------------------|-----------|
| Colon adenocarcinoma                | SW48      | 5 (GI <sub>50</sub> )   | 47        |
| Colon adenocarcinoma                | T84       | 140 (GI <sub>50</sub> ) | 47        |
| Colon adenocarcinoma                | SW620     | 150 (GI <sub>50</sub> ) | 47        |
| Colon adenocarcinoma                | LS174T    | 160 (GI <sub>50</sub> ) | 47        |
| Colon adenocarcinoma                | SW403     | 180 (GI <sub>50</sub> ) | 47        |
| Colon adenocarcinoma                | SW948     | 190 (GI <sub>50</sub> ) | 47        |
| Colon carcinoma                     | HCT 116   | 220 (GI <sub>50</sub> ) | 47        |
| Colon adenocarcinoma                | DLD-1     | 260 (GI <sub>50</sub> ) | 47        |
| Colon adenocarcinoma                | COLO320   | 360 (GI <sub>50</sub> ) | 47        |
| Colorectal carcinoma                | PC/JW2    | 450 (GI <sub>50</sub> ) | 47        |
| Colon adenocarcinoma                | LOVO      | 470 (GI <sub>50</sub> ) | 47        |
| Ovarian endometrioid adenocarcinoma | A2780     | 350 (GI <sub>50</sub> ) | 47        |



| Malignancy                                | Cell Line | IC <sub>50</sub> (nM)    | Reference |
|-------------------------------------------|-----------|--------------------------|-----------|
| Endocervical adenocarcinoma (HPV-related) | HeLa      | 140 (GI <sub>50</sub> )  | 47        |
| Neuroblastoma                             | Kelly     | 330 (GI <sub>50</sub> )  | 47        |
| Neuroblastoma                             | IMR-32    | 380 (GI <sub>50</sub> )  | 47        |
| Neuroblastoma                             | SHEP WT   | 390 (GI <sub>50</sub> )  | 47        |
| Neuroblastoma                             | SH-SY5Y   | 920 (GI <sub>50</sub> )  | 47        |
| Neuroblastoma                             | SK-N-SH   | 4930 (GI <sub>50</sub> ) | 47        |
| Neuroblastoma                             | SHEP      | 9210 (GI <sub>50</sub> ) | 47        |

## References:

- (1) Yang, J.; Ikezoe, T.; Nishioka, C.; Tasaka, T.; Taniguchi, A.; Kuwayama, Y.; Komatsu, N.; Bandobashi, K.; Togitani, K.; Koeffler, H. P.; Taguchi, H.; Yokoyama, A. AZD1152, a Novel and Selective Aurora B Kinase Inhibitor, Induces Growth Arrest, Apoptosis, and Sensitization for Tubulin Depolymerizing Agent or Topoisomerase II Inhibitor in Human Acute Leukemia Cells in Vitro and in Vivo. *Blood* **2007**, *110* (6), 2034–2040. <https://doi.org/10.1182/blood-2007-02-073700>.
- (2) Zekri, A.; Ghaffari, S. H.; Ghanizadeh-Vesali, S.; Yaghmaie, M.; Salmaninejad, A.; Alimoghaddam, K.; Modarressi, M. H.; Ghavamzadeh, A. AZD1152-HQPA Induces Growth Arrest and Apoptosis in Androgen-Dependent Prostate Cancer Cell Line (LNCaP) via Producing Aneugenic Micronuclei and Polyploidy. *Tumour Biol. J. Int. Soc. Oncodevelopmental Biol. Med.* **2015**, *36* (2), 623–632. <https://doi.org/10.1007/s13277-014-2664-8>.
- (3) Borah, N. A.; Sradhanjali, S.; Barik, M. R.; Jha, A.; Tripathy, D.; Kaliki, S.; Rath, S.; Raghav, S. K.; Patnaik, S.; Mittal, R.; Reddy, M. M. Aurora Kinase B Expression, Its Regulation and Therapeutic Targeting in Human Retinoblastoma. *Invest. Ophthalmol. Vis. Sci.* **2021**, *62* (3), 16. <https://doi.org/10.1167/iovs.62.3.16>.
- (4) Lin, Z.-Z.; Jeng, Y.-M.; Hu, F.-C.; Pan, H.-W.; Tsao, H.-W.; Lai, P.-L.; Lee, P.-H.; Cheng, A.-L.; Hsu, H.-C. Significance of Aurora B Overexpression in Hepatocellular Carcinoma. Aurora B Overexpression in HCC. *BMC Cancer* **2010**, *10*, 461. <https://doi.org/10.1186/1471-2407-10-461>.
- (5) Al-Khafaji, A. S.; Davies, M. P.; Risk, J. M.; Marcus, M. W.; Koffa, M.; Gosney, J. R.; Shaw, R. J.; Field, J. K.; Liloglou, T. Aurora B Expression Modulates Paclitaxel Response in Non-Small

- Cell Lung Cancer. *Br. J. Cancer* **2017**, *116* (5), 592–599. <https://doi.org/10.1038/bjc.2016.453>.
- (6) Tao, Y.; Zhang, P.; Girdler, F.; Frascogna, V.; Castedo, M.; Bourhis, J.; Kroemer, G.; Deutsch, E. Enhancement of Radiation Response in P53-Deficient Cancer Cells by the Aurora-B Kinase Inhibitor AZD1152. *Oncogene* **2008**, *27* (23), 3244–3255. <https://doi.org/10.1038/sj.onc.1210990>.
  - (7) ZHU, X. P.; LIU, Z. L.; PENG, A. F.; ZHOU, Y. F.; LONG, X. H.; LUO, Q. F.; HUANG, S. H.; SHU, Y. Inhibition of Aurora-B Suppresses Osteosarcoma Cell Migration and Invasion. *Exp. Ther. Med.* **2014**, *7* (3), 560–564. <https://doi.org/10.3892/etm.2014.1491>.
  - (8) Noronha, S.; Alt, L. A. C.; Scimeca, T. E.; Zarou, O.; Obrzut, J.; Zanotti, B.; Hayward, E. A.; Pillai, A.; Mathur, S.; Rojas, J.; Salamah, R.; Chandar, N.; Fay, M. J. Preclinical Evaluation of the Aurora Kinase Inhibitors AMG 900, AZD1152-HQPA, and MK-5108 on SW-872 and 93T449 Human Liposarcoma Cells. *In Vitro Cell. Dev. Biol. Anim.* **2018**, *54* (1), 71–84. <https://doi.org/10.1007/s11626-017-0208-4>.
  - (9) Sánchez-Molina, S.; Figuerola-Bou, E.; Blanco, E.; Sánchez-Jiménez, M.; Táboas, P.; Gómez, S.; Ballaré, C.; García-Domínguez, D. J.; Prada, E.; Hontecillas-Prieto, L.; M Carcaboso, Á.; Tirado, Ó. M.; Hernández-Muñoz, I.; de Álava, E.; Lavarino, C.; Di Croce, L.; Mora, J. RING1B Recruits EWSR1-FLI1 and Cooperates in the Remodeling of Chromatin Necessary for Ewing Sarcoma Tumorigenesis. *Sci. Adv.* **2020**, *6* (43), eaba3058. <https://doi.org/10.1126/sciadv.aba3058>.
  - (10) Gully, C. P.; Zhang, F.; Chen, J.; Yeung, J. A.; Velazquez-Torres, G.; Wang, E.; Yeung, S.-C. J.; Lee, M.-H. Antineoplastic Effects of an Aurora B Kinase Inhibitor in Breast Cancer. *Mol. Cancer* **2010**, *9*, 42. <https://doi.org/10.1186/1476-4598-9-42>.
  - (11) Baldini, E.; Tuccilli, C.; Prinzi, N.; Sorrenti, S.; Antonelli, A.; Gnassi, L.; Morrone, S.; Moretti, C.; Bononi, M.; Arlot-Bonnemains, Y.; D’Armiento, M.; Ulisse, S. Effects of Selective Inhibitors of Aurora Kinases on Anaplastic Thyroid Carcinoma Cell Lines. *Endocr. Relat. Cancer* **2014**, *21* (5), 797–811. <https://doi.org/10.1530/ERC-14-0299>.
  - (12) Tuccilli, C.; Baldini, E.; Prinzi, N.; Morrone, S.; Sorrenti, S.; Filippini, A.; Catania, A.; Alessandrini, S.; Rendina, R.; Coccaro, C.; D’Armiento, M.; Ulisse, S. Preclinical Testing of Selective Aurora Kinase Inhibitors on a Medullary Thyroid Carcinoma-Derived Cell Line. *Endocrine* **2016**, *52* (2), 287–295. <https://doi.org/10.1007/s12020-015-0700-0>.
  - (13) Aihara, A.; Tanaka, S.; Yasen, M.; Matsumura, S.; Mitsunori, Y.; Murakata, A.; Noguchi, N.; Kudo, A.; Nakamura, N.; Ito, K.; Arii, S. The Selective Aurora B Kinase Inhibitor AZD1152 as a Novel Treatment for Hepatocellular Carcinoma. *J. Hepatol.* **2010**, *52* (1), 63–71. <https://doi.org/10.1016/j.jhep.2009.10.013>.
  - (14) He, J.; Qi, Z.; Zhang, X.; Yang, Y.; Liu, F.; Zhao, G.; Wang, Z. Aurora Kinase B Inhibitor Barasertib (AZD1152) Inhibits Glucose Metabolism in Gastric Cancer Cells. *Anticancer. Drugs* **2019**, *30* (1), 19–26. <https://doi.org/10.1097/CAD.0000000000000684>.
  - (15) Wu, Z.-X.; Yang, Y.; Wang, J.-Q.; Zhou, W.-M.; Chen, J.; Fu, Y.-G.; Patel, K.; Chen, Z.-S.; Zhang, J.-Y. Elevated ABCB1 Expression Confers Acquired Resistance to Aurora Kinase Inhibitor GSK-1070916 in Cancer Cells. *Front. Pharmacol.* **2021**, *11*, 615824. <https://doi.org/10.3389/fphar.2020.615824>.
  - (16) Hardwicke, M. A.; Oleykowski, C. A.; Plant, R.; Wang, J.; Liao, Q.; Moss, K.; Newlander, K.; Adams, J. L.; Dhanak, D.; Yang, J.; Lai, Z.; Sutton, D.; Patrick, D. GSK1070916, a Potent Aurora B/C Kinase Inhibitor with Broad Antitumor Activity in Tissue Culture Cells and Human Tumor Xenograft Models. *Mol. Cancer Ther.* **2009**, *8* (7), 1808–1817. <https://doi.org/10.1158/1535-7163.MCT-09-0041>.
  - (17) Benten, D.; Keller, G.; Quaas, A.; Schrader, J.; Gontarewicz, A.; Balabanov, S.; Braig, M.; Wege, H.; Moll, J.; Lohse, A. W.; Brummendorf, T. H. Aurora Kinase Inhibitor PHA-739358 Suppresses Growth of Hepatocellular Carcinoma In Vitro and in a Xenograft Mouse Model. *Neoplasia N. Y. N* **2009**, *11* (9), 934–944.
  - (18) Zhang, Y.; Zhang, B.; Feng, W.; Li, Y.; Cao, X. [Molecular mechanism of Aurora kinase inhibitor PHA739358 in inhibited proliferation and induced apoptosis of breast cancer cells]. *Zhonghua Yi Xue Za Zhi* **2012**, *92* (1), 45–49.

- (19) Xie, L.; Meyskens, F. L. The Pan-Aurora Kinase Inhibitor, PHA-739358, Induces Apoptosis and Inhibits Migration in Melanoma Cell Lines. *Melanoma Res.* **2013**, *23* (2), 102–113. <https://doi.org/10.1097/CMR.0b013e32835df5e4>.
- (20) He, S.-J.; Shu, L.-P.; Zhou, Z.-W.; Yang, T.; Duan, W.; Zhang, X.; He, Z.-X.; Zhou, S.-F. Inhibition of Aurora Kinases Induces Apoptosis and Autophagy via AURKB/P70S6K/RPL15 Axis in Human Leukemia Cells. *Cancer Lett.* **2016**, *382* (2), 215–230. <https://doi.org/10.1016/j.canlet.2016.08.016>.
- (21) Li, J.-P.; Yang, Y.-X.; Liu, Q.-L.; Zhou, Z.-W.; Pan, S.-T.; He, Z.-X.; Zhang, X.; Yang, T.; Pan, S.-Y.; Duan, W.; He, S.-M.; Chen, X.-W.; Qiu, J.-X.; Zhou, S.-F. The Pan-Inhibitor of Aurora Kinases Danusertib Induces Apoptosis and Autophagy and Suppresses Epithelial-to-Mesenchymal Transition in Human Breast Cancer Cells. *Drug Des. Devel. Ther.* **2015**, *9*, 1027–1062. <https://doi.org/10.2147/DDDT.S74412>.
- (22) Zi, D.; Zhou, Z.-W.; Yang, Y.-J.; Huang, L.; Zhou, Z.-L.; He, S.-M.; He, Z.-X.; Zhou, S.-F. Danusertib Induces Apoptosis, Cell Cycle Arrest, and Autophagy but Inhibits Epithelial to Mesenchymal Transition Involving PI3K/Akt/MTOR Signaling Pathway in Human Ovarian Cancer Cells. *Int. J. Mol. Sci.* **2015**, *16* (11), 27228–27251. <https://doi.org/10.3390/ijms161126018>.
- (23) Balabanov, S.; Gontarewicz, A.; Keller, G.; Raddrizzani, L.; Braig, M.; Bosotti, R.; Moll, J.; Jost, E.; Barrett, C.; Rohe, I.; Bokemeyer, C.; Holyoake, T. L.; Brümmendorf, T. H. Abcg2 Overexpression Represents a Novel Mechanism for Acquired Resistance to the Multi-Kinase Inhibitor Danusertib in BCR-ABL-Positive Cells In Vitro. *PLoS ONE* **2011**, *6* (4), e19164. <https://doi.org/10.1371/journal.pone.0019164>.
- (24) Zhu, Q.; Yu, X.; Zhou, Z.-W.; Luo, M.; Zhou, C.; He, Z.-X.; Chen, Y.; Zhou, S.-F. A Quantitative Proteomic Response of Hepatocellular Carcinoma Hep3B Cells to Danusertib, a Pan-Aurora Kinase Inhibitor. *J. Cancer* **2018**, *9* (12), 2061–2071. <https://doi.org/10.7150/jca.20822>.
- (25) Yuan, C.-X.; Zhou, Z.-W.; Yang, Y.-X.; He, Z.-X.; Zhang, X.; Wang, D.; Yang, T.; Pan, S.-Y.; Chen, X.-W.; Zhou, S.-F. Danusertib, a Potent Pan-Aurora Kinase and ABL Kinase Inhibitor, Induces Cell Cycle Arrest and Programmed Cell Death and Inhibits Epithelial to Mesenchymal Transition Involving the PI3K/Akt/MTOR-Mediated Signaling Pathway in Human Gastric Cancer AGS and NCI-N78 Cells. *Drug Des. Devel. Ther.* **2015**, *9*, 1293–1318. <https://doi.org/10.2147/DDDT.S74964>.
- (26) Shang, Y.-Y.; Yu, N.; Xia, L.; Yu, Y.-Y.; Ma, C.; Jiao, Y.-N.; Li, Y.; Wang, Y.; Dang, J.; Li, W. Augmentation of Danusertib's Anticancer Activity against Melanoma by Blockage of Autophagy. *Drug Deliv. Transl. Res.* **2020**, *10* (1), 136–145. <https://doi.org/10.1007/s13346-019-00668-5>.
- (27) Tanaka, R.; Squires, M. S.; Kimura, S.; Yokota, A.; Nagao, R.; Yamauchi, T.; Takeuchi, M.; Yao, H.; Reule, M.; Smyth, T.; Lyons, J. F.; Thompson, N. T.; Ashihara, E.; Ottmann, O. G.; Maekawa, T. Activity of the Multitargeted Kinase Inhibitor, AT9283, in Imatinib-Resistant BCR-ABL-Positive Leukemic Cells. *Blood* **2010**, *116* (12), 2089–2095. <https://doi.org/10.1182/blood-2009-03-211466>.
- (28) Qi, W.; Liu, X.; Cooke, L. S.; Persky, D. O.; Miller, T. P.; Squires, M.; Mahadevan, D. AT9283, a Novel Aurora Kinase Inhibitor, Suppresses Tumor Growth in Aggressive B-Cell Lymphomas. *Int. J. Cancer* **2012**, *130* (12), 2997–3005. <https://doi.org/10.1002/ijc.26324>.
- (29) Kalous, O.; Conklin, D.; Desai, A. J.; Dering, J.; Goldstein, J.; Ginther, C.; Anderson, L.; Lu, M.; Kolarova, T.; Eckardt, M. A.; Langerød, A.; Børresen-Dale, A.-L.; Slamon, D. J.; Finn, R. S. AMG 900, Pan-Aurora Kinase Inhibitor, Preferentially Inhibits the Proliferation of Breast Cancer Cell Lines with Dysfunctional P53. *Breast Cancer Res. Treat.* **2013**, *141* (3), 397–408. <https://doi.org/10.1007/s10549-013-2702-z>.
- (30) Payton, M.; Bush, T. L.; Chung, G.; Ziegler, B.; Eden, P.; McElroy, P.; Ross, S.; Cee, V. J.; Deak, H. L.; Hodous, B. L.; Nguyen, H. N.; Olivieri, P. R.; Romero, K.; Schenkel, L. B.; Bak, A.; Stanton, M.; Dussault, I.; Patel, V. F.; Geuns-Meyer, S.; Radinsky, R.; Kendall, R. L. Preclinical Evaluation of AMG 900, a Novel Potent and Highly Selective Pan-Aurora Kinase Inhibitor with

- Activity in Taxane-Resistant Tumor Cell Lines. *Cancer Res.* **2010**, *70* (23), 9846–9854. <https://doi.org/10.1158/0008-5472.CAN-10-3001>.
- (31) Lee, H.-A.; Kwon, M.; Kim, H.-A.; Kim, K.-S. Antitumor Profiles and Cardiac Electrophysiological Effects of Aurora Kinase Inhibitor ZM447439. *Korean J. Physiol. Pharmacol.* **2019**, *23* (5), 393–402. <https://doi.org/10.4196/kjpp.2019.23.5.393>.
  - (32) Shiomitsu, K.; Xia, X.; Waite, K.; Sehgal, I.; Li, S. Evaluation of the Aurora Kinase Inhibitor, ZM447439, in Canine Malignant Lymphoid Cells *in Vitro*. **2013**, *2013*. <https://doi.org/10.4236/ojvm.2013.31006>.
  - (33) Tavanti, E.; Sero, V.; Vella, S.; Fanelli, M.; Michelacci, F.; Landuzzi, L.; Magagnoli, G.; Versteeg, R.; Picci, P.; Hattinger, C. M.; Serra, M. Preclinical Validation of Aurora Kinases-Targeting Drugs in Osteosarcoma. *Br. J. Cancer* **2013**, *109* (10), 2607–2618. <https://doi.org/10.1038/bjc.2013.643>.
  - (34) Vidarsdottir, L.; Steingrimsdottir, G.; Bodvarsdottir, S. K.; Ogmundsdottir, H. M.; Eyfjord, J. E. Sensitivity of BRCA2 Mutated Human Cell Lines to Aurora Kinase Inhibition. *Invest. New Drugs* **2012**, *30* (2), 425–434. <https://doi.org/10.1007/s10637-010-9566-4>.
  - (35) Wang, S.; Midgley, C. A.; Scaërou, F.; Grabarek, J. B.; Griffiths, G.; Jackson, W.; Kontopidis, G.; McClue, S. J.; McInnes, C.; Meades, C.; Mezna, M.; Plater, A.; Stuart, I.; Thomas, M. P.; Wood, G.; Clarke, R. G.; Blake, D. G.; Zheleva, D. I.; Lane, D. P.; Jackson, R. C.; Glover, D. M.; Fischer, P. M. Discovery of N-Phenyl-4-(Thiazol-5-Yl)Pyrimidin-2-Amine Aurora Kinase Inhibitors. *J. Med. Chem.* **2010**, *53* (11), 4367–4378. <https://doi.org/10.1021/jm901913s>.
  - (36) Le, T. T. D.; Ha, P. T.; Tran, T. H. Y.; Nguyen, D. T.; Nguyen, H. N.; Bui, V. K.; Hoang, M. N.  $\text{In Vitro}$  Evaluation of Aurora Kinase Inhibitor—VX680—in Formulation of PLA-TPGS Nanoparticles. *Adv. Nat. Sci. Nanosci. Nanotechnol.* **2016**, *7* (2), 025010. <https://doi.org/10.1088/2043-6262/7/2/025010>.
  - (37) Arbitrario, J. P.; Belmont, B. J.; Evanchik, M. J.; Flanagan, W. M.; Fucini, R. V.; Hansen, S. K.; Harris, S. O.; Hashash, A.; Hoch, U.; Hogan, J. N.; Howlett, A. R.; Jacobs, J. W.; Lam, J. W.; Ritchie, S. C.; Romanowski, M. J.; Silverman, J. A.; Stockett, D. E.; Teague, J. N.; Zimmerman, K. M.; Taverna, P. SNS-314, a Pan-Aurora Kinase Inhibitor, Shows Potent Anti-Tumor Activity and Dosing Flexibility in Vivo. *Cancer Chemother. Pharmacol.* **2010**, *65* (4), 707–717. <https://doi.org/10.1007/s00280-009-1076-8>.
  - (38) Sini, P.; Gürtler, U.; Zahn, S. K.; Baumann, C.; Rudolph, D.; Baumgartinger, R.; Strauss, E.; Haslinger, C.; Tontsch-Grunt, U.; Waizenegger, I. C.; Solca, F.; Bader, G.; Zoephel, A.; Treu, M.; Reiser, U.; Garin-Chesa, P.; Boehmelt, G.; Kraut, N.; Quant, J.; Adolf, G. R. Pharmacological Profile of BI 847325, an Orally Bioavailable, ATP-Competitive Inhibitor of MEK and Aurora Kinases. *Mol. Cancer Ther.* **2016**, *15* (10), 2388–2398. <https://doi.org/10.1158/1535-7163.MCT-16-0066>.
  - (39) Phadke, M. S.; Sini, P.; Smalley, K. S. M. The Novel ATP-Competitive MEK/Aurora Kinase Inhibitor BI-847325 Overcomes Acquired BRAF Inhibitor Resistance through Suppression of Mcl-1 and MEK Expression. *Mol. Cancer Ther.* **2015**, *14* (6), 1354–1364. <https://doi.org/10.1158/1535-7163.MCT-14-0832>.
  - (40) He, Y.; Fu, W.; Du, L.; Yao, H.; Hua, Z.; Li, J.; Lin, Z. Discovery of a Novel Aurora B Inhibitor GSK650394 with Potent Anticancer and Anti-Aspergillus Fumigatus Dual Efficacies in Vitro. *J. Enzyme Inhib. Med. Chem.* **2022**, *37* (1), 109–117. <https://doi.org/10.1080/14756366.2021.1975693>.
  - (41) Lakkaniga, N. R.; Zhang, L.; Belachew, B.; Gunaganti, N.; Frett, B.; Li, H. Discovery of SP-96, the First Non-ATP-Competitive Aurora Kinase B Inhibitor, for Reduced Myelosuppression. *Eur. J. Med. Chem.* **2020**, *203*, 112589. <https://doi.org/10.1016/j.ejmech.2020.112589>.
  - (42) Soncini, C.; Carpinelli, P.; Gianellini, L.; Fancelli, D.; Vianello, P.; Rusconi, L.; Storici, P.; Zugnoni, P.; Pesenti, E.; Croci, V.; Ceruti, R.; Giorgini, M. L.; Cappella, P.; Ballinari, D.; Sola, F.; Varasi, M.; Bravo, R.; Moll, J. PHA-680632, a Novel Aurora Kinase Inhibitor with Potent Antitumoral Activity. *Clin. Cancer Res.* **2006**, *12* (13), 4080–4089.

0432.CCR-05-1964.

- (43) Chan, F.; Sun, C.; Perumal, M.; Nguyen, Q.-D.; Bavetsias, V.; McDonald, E.; Martins, V.; Wilsher, N. E.; Raynaud, F. I.; Valenti, M.; Eccles, S.; te Poele, R.; Workman, P.; Aboagye, E. O.; Linardopoulos, S. Mechanism of Action of the Aurora Kinase Inhibitor CCT129202 and in Vivo Quantification of Biological Activity. *Mol. Cancer Ther.* **2007**, *6* (12), 3147–3157. <https://doi.org/10.1158/1535-7163.MCT-07-2156>.
- (44) Cheng, C.; Liu, Z.; Zhang, H.; Xie, J.; Chen, X.; Zhao, X.; Wang, F.; Liang, Y.; Chen, L.; Singh, S.; Chen, J.; Talele, T. T.; Chen, Z.; Zhong, F.; Fu, L. Enhancing Chemosensitivity in ABCB1- and ABCG2-Overexpressing Cells and Cancer Stem-like Cells by An Aurora Kinase Inhibitor CCT129202. *Mol. Pharm.* **2012**, *9* (7), 1971–1982. <https://doi.org/10.1021/mp2006714>.
- (45) Huang, D.; Huang, Y.; Huang, Z.; Weng, J.; Zhang, S.; Gu, W. Relation of AURKB Over-Expression to Low Survival Rate in BCRA and Reversine-Modulated Aurora B Kinase in Breast Cancer Cell Lines. *Cancer Cell Int.* **2019**, *19* (1), 166. <https://doi.org/10.1186/s12935-019-0885-z>.
- (46) Lu, Y.-C.; Lee, Y.-R.; Liao, J.-D.; Lin, C.-Y.; Chen, Y.-Y.; Chen, P.-T.; Tseng, Y.-S. Reversine Induced Multinucleated Cells, Cell Apoptosis and Autophagy in Human Non-Small Cell Lung Cancer Cells. *PLOS ONE* **2016**, *11* (7), e0158587. <https://doi.org/10.1371/journal.pone.0158587>.
- (47) Faisal, A.; Vaughan, L.; Bavetsias, V.; Sun, C.; Atrash, B.; Avery, S.; Jamin, Y.; Robinson, S. P.; Workman, P.; Blagg, J.; Raynaud, F. I.; Eccles, S. A.; Chesler, L.; Linardopoulos, S. The Aurora Kinase Inhibitor CCT137690 Downregulates MYCN and Sensitizes MYCN-Amplified Neuroblastoma In Vivo. *Mol. Cancer Ther.* **2011**, *10* (11), 2115–2123. <https://doi.org/10.1158/1535-7163.MCT-11-0333>.
